# Supplementary material for: DHX15 regulates CMTR1-dependent gene expression and cell proliferation
Source: Life Sci Alliance. 2018 Jun 18;1(3):e201800092. doi: 10.26508/lsa.201800092 (PMC6071836; doi:10.26508/lsa.201800092)
Supplement: Supplementary file 1 [file LSA-2018-00092_TableS1.xlsx]

## Sheet: Sequenced Input transcripts
Table 1: mRNA expression data from RNAseq of HCC1806 transfected with CMTR1 WT or 2L/A. Data was normalised, and conditions were compared with a negative binomial test using the EdgeR package in R. FDR is the false discovery rate.
		Normalised reads.
Ensembl ID	HGNC symbol	input WT 1	input 2L/A 1	input WT 2	input 2L/A 2	Log2 fold change (ratio 2L/A/ WT)	FDR (statistics)
ENSG00000000003	TSPAN6	93.8613	113.157	102.832	74.1084	-0.0702642	1
ENSG00000000419	DPM1	77.507	91.1572	105.505	75.9022	-0.130161	1
ENSG00000000457	SCYL3	12.1726	12.6725	15.4185	14.5552	-0.0145617	1
ENSG00000000460	C1orf112	46.3717	51.8207	60.2442	44.4343	-0.145287	1
ENSG00000000971	CFH	103.094	115.654	88.0971	71.9046	-0.0278413	1
ENSG00000001036	FUCA2	216.125	256.889	195.965	181.273	0.0884478	1
ENSG00000001084	GCLC	121.684	131.295	184.836	161.029	-0.0677971	1
ENSG00000001167	NFYA	21.6539	23.0837	25.8012	22.3965	-0.0581918	1
ENSG00000001460	STPG1	6.50032	6.92512	6.27933	5.74007	-0.012834	1
ENSG00000001461	NIPAL3	53.3689	55.9192	44.8257	35.5679	-0.102475	1
ENSG00000001497	LAS1L	110.547	98.9775	96.9254	110.138	0.0106592	1
ENSG00000001561	ENPP4	19.7908	23.6962	19.0867	14.4527	-0.0266342	1
ENSG00000001617	SEMA3F	11.4687	10.6468	3.04641	3.38254	-0.0539237	1
ENSG00000001629	ANKIB1	75.0228	78.7203	83.372	69.8546	-0.0915244	1
ENSG00000001630	CYP51A1	25.1318	22.5184	15.7294	19.2702	0.0280119	1
ENSG00000001631	KRIT1	39.83	39.9961	47.8721	51.8656	0.0680362	1
ENSG00000002016	RAD52	18.0932	14.2271	18.7758	21.1153	-0.0616432	1
ENSG00000002330	BAD	17.348	14.0858	13.3669	17.0152	0.0122217	1
ENSG00000002549	LAP3	113.155	112.404	135.658	112.598	-0.14443	1
ENSG00000002746	HECW1	29.1893	27.9832	30.1532	28.5466	-0.0695835	1
ENSG00000002822	MAD1L1	22.7304	16.8182	20.0192	25.4716	-0.0182662	1
ENSG00000002834	LASP1	153.027	135.676	167.428	174.97	-0.0447577	1
ENSG00000002919	SNX11	19.9564	19.4563	18.6515	18.4502	-0.0276346	1
ENSG00000003056	M6PR	236.289	273.283	256.644	204.849	-0.0437558	1
ENSG00000003096	KLHL13	8.52908	7.58466	10.4448	7.27759	-0.345982	1
ENSG00000003137	CYP26B1	1.86315	1.69595	1.67863	1.94752	0.030368	1
ENSG00000003147	ICA1	15.3192	15.2635	11.1287	9.58387	-0.0931522	1
ENSG00000003249	DBNDD1	3.60209	2.82658	2.79772	2.56253	-0.259821	1
ENSG00000003393	ALS2	58.5443	57.6623	54.6488	58.887	0.0414471	1
ENSG00000003400	CASP10	14.3255	15.1222	13.7399	12.5052	-0.0227629	1
ENSG00000003402	CFLAR	53.4103	51.5851	39.9763	52.6344	0.156385	1
ENSG00000003436	TFPI	268.086	302.397	184.028	194.701	0.136617	1
ENSG00000003509	NDUFAF7	49.1457	47.2039	46.8773	36.5417	-0.19725	1
ENSG00000003756	RBM5	57.5092	53.3282	60.9281	54.9407	-0.129045	1
ENSG00000003989	SLC7A2	571.655	611.201	404.612	445.06	0.113485	1
ENSG00000004059	ARF5	55.3148	52.3389	39.9763	38.1305	-0.0765264	1
ENSG00000004139	SARM1	10.5164	8.99795	8.20664	12.4027	0.185165	1
ENSG00000004142	POLDIP2	123.423	116.879	130.622	136.942	-0.00118439	1
ENSG00000004399	PLXND1	31.2181	32.0817	19.3354	25.0103	0.171936	1
ENSG00000004455	AK2	170.996	172.845	211.445	213.818	0.0161675	1
ENSG00000004478	FKBP4	163.543	159.513	175.51	184.502	0.0210645	1
ENSG00000004487	KDM1A	148.1	148.207	174.951	152.214	-0.104305	1
ENSG00000004534	RBM6	45.171	47.9106	49.7994	47.4581	0.00709189	1
ENSG00000004660	CAMKK1	80.8607	65.3411	75.2897	73.9547	-0.165413	1
ENSG00000004700	RECQL	62.2292	67.7908	75.9736	68.1121	-0.0228618	1
ENSG00000004766	VPS50	21.5711	21.7647	22.5061	20.3465	-0.0647618	1
ENSG00000004779	NDUFAB1	122.388	125.17	150.704	128.588	-0.1053	1
ENSG00000004799	PDK4	9.93679	8.62107	9.20139	9.53262	-0.0792228	1
ENSG00000004864	SLC25A13	78.3351	80.8873	105.132	91.1749	-0.091513	1
ENSG00000004866	ST7	47.1998	53.4695	44.3283	47.8168	0.145658	1
ENSG00000004897	CDC27	153.979	165.732	221.393	191.985	-0.0689537	1
ENSG00000004961	HCCS	53.8657	60.6302	65.0936	61.3983	0.038266	1
ENSG00000004975	DVL2	38.3809	33.071	33.324	38.8992	0.00317533	1
ENSG00000005007	UPF1	64.4649	56.2961	51.478	64.1658	0.0532462	1
ENSG00000005020	SKAP2	56.3913	53.9406	60.8659	50.3794	-0.167805	1
ENSG00000005022	SLC25A5	555.26	541.479	595.976	576.723	-0.0419528	1
ENSG00000005059	MCUB	24.5936	25.8161	28.1015	16.1952	-0.324325	1
ENSG00000005073	HOXA11	7.32839	5.3705	7.83362	9.32761	-0.0455439	1
ENSG00000005075	POLR2J	23.8483	21.4349	25.9877	24.9591	-0.102371	1
ENSG00000005100	DHX33	41.7759	44.5658	43.5823	49.8156	0.145205	1
ENSG00000005108	THSD7A	37.5942	42.1632	28.8476	27.3166	0.0633684	1
ENSG00000005156	LIG3	83.8417	80.0394	85.6724	76.8759	-0.111215	1
ENSG00000005175	RPAP3	53.3689	48.099	71.6216	77.8497	0.0117658	1
ENSG00000005189		18.0932	16.0644	15.4185	16.9127	-0.0266168	1
ENSG00000005194	CIAPIN1	112.493	111.32	137.896	136.48	-0.0145067	1
ENSG00000005206	SPPL2B	12.3796	9.84592	8.02013	11.1214	0.0297853	1
ENSG00000005238	FAM214B	9.81258	8.95084	5.4711	6.15008	-0.0252252	1
ENSG00000005243	COPZ2	2.89823	2.96791	2.92206	2.87004	0.00528533	1
ENSG00000005249	PRKAR2B	4.51296	4.66386	5.9063	4.1513	-0.229204	1
ENSG00000005302	MSL3	20.0392	20.634	28.5367	22.6528	-0.161946	1
ENSG00000005339	CREBBP	36.1451	32.9297	25.8634	32.2879	0.0691791	1
ENSG00000005436	GCFC2	38.9605	41.5507	48.556	49.3031	0.0557602	1
ENSG00000005448	WDR54	25.5458	23.0366	19.9571	18.6552	-0.128779	1
ENSG00000005469	CROT	18.3831	17.0066	21.5735	16.349	-0.257304	1
ENSG00000005483	KMT2E	22.8132	21.482	20.5166	20.1415	-0.0596549	1
ENSG00000005486	RHBDD2	68.3569	66.142	54.2758	54.6844	-0.0226957	1
ENSG00000005700	IBTK	130.296	124.464	123.784	134.482	0.0271133	1
ENSG00000005801	ZNF195	32.4188	30.2915	35.0026	42.128	0.10331	1
ENSG00000005810	MYCBP2	115.267	113.157	115.142	113.366	-0.0245363	1
ENSG00000005812	FBXL3	46.3717	49.9834	60.4307	46.6893	-0.141468	1
ENSG00000005884	ITGA3	43.2251	36.1331	19.584	26.1891	-0.0140042	1
ENSG00000005889	ZFX	99.7406	99.0717	96.4902	107.114	0.071132	1
ENSG00000005893	LAMP2	356.441	431.101	339.581	320.316	0.110486	1
ENSG00000006007	GDE1	217.823	223.535	198.265	146.936	-0.167524	1
ENSG00000006015	C19orf60	12.3382	9.51616	8.76619	11.6851	-0.00226886	1
ENSG00000006016	CRLF1	56.0601	50.8785	32.5779	37.4642	-0.0069734	1
ENSG00000006042	TMEM98	6.58313	7.06645	5.16024	5.89382	0.134456	1
ENSG00000006062	MAP3K14	29.8518	25.8632	21.2005	29.0591	0.101168	1
ENSG00000006118	TMEM132A	42.19	37.9233	26.0499	39.6167	0.180485	1
ENSG00000006125	AP2B1	264.36	269.42	270.757	237.547	-0.0778695	1
ENSG00000006194	ZNF263	72.7042	65.718	58.1304	71.1871	0.0637852	1
ENSG00000006282	SPATA20	58.7927	48.6643	43.4579	48.1243	-0.0815625	1
ENSG00000006327	TNFRSF12A	169.505	167.334	125.338	175.738	0.217748	1
ENSG00000006432	MAP3K9	2.27718	1.97861	1.42995	2.61378	0.275287	1
ENSG00000006451	RALA	30.7627	30.1973	36.3704	33.9792	-0.0632442	1
ENSG00000006453	BAIAP2L1	31.5493	28.784	24.2469	28.8029	0.04199	1
ENSG00000006459	KDM7A	6.99716	7.302	3.91681	7.48259	0.425481	1
ENSG00000006468	ETV1	59.0825	55.2597	75.6006	63.6533	-0.178428	1
ENSG00000006530	AGK	83.3863	86.4463	82.9368	77.0809	-0.0243434	1
ENSG00000006534	ALDH3B1	36.7661	29.5378	28.2881	33.0567	-0.05903	1
ENSG00000006576	PHTF2	244.445	295.66	280.145	200.339	-0.0805844	1
ENSG00000006607	FARP2	75.8095	76.459	73.8598	82.0523	0.0825217	1
ENSG00000006611	USH1C	28.8167	27.7476	30.8371	27.7266	-0.103764	1
ENSG00000006625	GGCT	35.2342	37.782	51.478	37.823	-0.194765	1
ENSG00000006634	DBF4	61.5667	58.0391	81.196	67.1896	-0.187654	1
ENSG00000006638	TBXA2R	7.12137	8.80951	5.9063	4.76631	0.0577831	1
ENSG00000006652	IFRD1	154.434	165.167	207.156	223.043	0.102876	1
ENSG00000006695	COX10	45.2538	45.6022	40.4115	39.463	-0.0110139	1
ENSG00000006704	GTF2IRD1	31.6321	25.8161	24.9308	28.3416	-0.0662424	1
ENSG00000006712	PAF1	29.2307	30.1031	33.324	32.1854	-0.00451171	1
ENSG00000006715	VPS41	52.251	51.6322	73.3003	63.7558	-0.120217	1
ENSG00000006740	ARHGAP44	3.27086	2.40259	2.42469	2.92129	-0.116127	1
ENSG00000006744	ELAC2	237.241	248.88	209.767	208.539	0.033041	1
ENSG00000006756	ARSD	35.4412	41.4565	31.0858	27.7778	0.0570335	1
ENSG00000006757	PNPLA4	7.12137	8.57396	4.22767	5.68882	0.318125	1
ENSG00000006831	ADIPOR2	156.173	160.738	142.622	108.446	-0.150563	1
ENSG00000007047	MARK4	9.89539	9.37483	6.40367	7.12384	0.0100536	1
ENSG00000007080	CCDC124	19.4182	17.3835	13.2425	19.3727	0.163653	1
ENSG00000007168	PAFAH1B1	123.837	127.385	150.89	158.262	0.0566528	1
ENSG00000007202	KIAA0100	564.203	611.672	527.899	443.164	-0.0500875	1
ENSG00000007237	GAS7	4.05752	4.33409	3.60595	3.53629	0.034554	1
ENSG00000007341	ST7L	26.7465	33.0239	29.9045	22.5503	-0.0255809	1
ENSG00000007372	PAX6	5.58945	5.74738	6.15498	6.50883	0.0643398	1
ENSG00000007376	RPUSD1	43.3079	31.7519	36.619	55.9657	0.132623	1
ENSG00000007384	RHBDF1	25.5872	23.602	15.6051	17.4765	-0.00830594	1
ENSG00000007392	LUC7L	34.1577	34.343	40.7845	40.898	0.00727461	1
ENSG00000007520	TSR3	34.4476	25.9574	25.8012	35.9267	0.0351058	1
ENSG00000007541	PIGQ	15.4434	15.2635	8.9527	11.8389	0.144577	1
ENSG00000007545	CRAMP1	8.7361	7.72599	6.65236	6.71383	-0.0990619	1
ENSG00000007866	TEAD3	1.94596	2.21416	1.86515	1.74252	0.0543219	1
ENSG00000007923	DNAJC11	80.8193	73.02	84.1803	102.348	0.087824	1
ENSG00000007944	MYLIP	12.007	11.3063	12.0613	10.3526	-0.151491	1
ENSG00000007968	E2F2	27.4918	27.3707	32.8887	35.0554	0.0494969	1
ENSG00000008018	PSMB1	175.053	186.177	189.561	163.848	-0.0586272	1
ENSG00000008083	JARID2	13.2077	13.7089	10.88	12.2489	0.10331	1
ENSG00000008086	CDKL5	11.4273	10.5055	8.82836	8.76386	-0.0766815	1
ENSG00000008130	NADK	43.6391	36.6513	34.7539	38.8992	-0.0559509	1
ENSG00000008256	CYTH3	24.635	23.9317	19.0867	22.499	0.082814	1
ENSG00000008277	ADAM22	18.4245	18.7025	18.9623	15.3239	-0.134456	1
ENSG00000008282	SYPL1	148.1	182.126	163.511	129.152	-0.00115189	1
ENSG00000008283	CYB561	58.2959	62.8443	51.3537	55.2482	0.106082	1
ENSG00000008294	SPAG9	389.522	420.407	355.808	332.002	0.0135901	1
ENSG00000008300	CELSR3	3.97472	2.07283	1.7408	3.38254	-0.093697	1
ENSG00000008311	AASS	8.28066	9.46905	7.58493	9.02011	0.218597	1
ENSG00000008324	SS18L2	9.72978	11.165	15.4185	11.6851	-0.130194	1
ENSG00000008382	MPND	2.93963	2.96791	1.3056	2.30628	0.278605	1
ENSG00000008394	MGST1	538.119	641.069	586.029	445.265	-0.0492657	1
ENSG00000008405	CRY1	43.9703	49.9834	50.1103	50.2256	0.0924225	1
ENSG00000008441	NFIX	5.63085	5.04074	4.66287	6.66258	0.175835	1
ENSG00000008513	ST3GAL1	219.231	223.865	198.825	249.129	0.177859	1
ENSG00000008710	PKD1	51.6713	39.7135	23.6252	53.6082	0.306527	1
ENSG00000008838	MED24	66.3281	61.3368	57.633	58.5282	-0.0495117	1
ENSG00000008853	RHOBTB2	26.7465	23.5077	19.8949	28.4954	0.152337	1
ENSG00000008869	HEATR5B	41.6103	45.2724	42.774	38.7967	-0.00473252	1
ENSG00000008952	SEC62	197.163	208.555	203.052	176.405	-0.0559166	1
ENSG00000008988	RPS20	499.614	532.528	623.643	556.377	-0.0446474	1
ENSG00000009307	CSDE1	407.077	426.814	506.325	455.464	-0.0498294	1
ENSG00000009335	UBE3C	230.782	224.431	242.78	227.655	-0.0668513	1
ENSG00000009413	REV3L	22.3164	22.7069	28.2881	35.4142	0.201376	1
ENSG00000009709	PAX7	2.11157	1.74306	1.98949	1.89627	-0.177435	1
ENSG00000009780	FAM76A	9.27434	9.42194	9.88528	9.48137	-0.0174882	1
ENSG00000009830	POMT2	42.2314	43.7178	34.8161	40.1805	0.120793	1
ENSG00000009844	VTA1	69.7646	68.8273	95.0603	72.8271	-0.217113	1
ENSG00000009954	BAZ1B	267.3	278.56	297.926	303.301	0.0419918	1
ENSG00000010017	RANBP9	28.7339	30.5742	31.7697	28.1878	-0.0403388	1
ENSG00000010072	SPRTN	38.5879	39.9961	42.3388	39.463	-0.0252835	1
ENSG00000010165	METTL13	47.1584	43.0583	50.1724	57.7595	0.0508183	1
ENSG00000010219	DYRK4	9.93679	10.1757	10.88	11.1726	0.038316	1
ENSG00000010244	ZNF207	220.017	221.604	260.623	275.677	0.049303	1
ENSG00000010256	UQCRC1	307.295	300.984	217.849	235.343	0.030067	1
ENSG00000010270	STARD3NL	112.7	129.175	130.374	80.9247	-0.209719	1
ENSG00000010278	CD9	80.3224	95.3971	55.8922	51.5581	0.108904	1
ENSG00000010292	NCAPD2	199.233	199.18	210.264	177.173	-0.12158	1
ENSG00000010318	PHF7	2.93963	3.67456	3.60595	2.40878	-0.0927002	1
ENSG00000010322	NISCH	34.4476	31.9875	25.9255	29.5716	0.0247138	1
ENSG00000010404	IDS	28.2371	27.8889	25.8634	27.1116	0.0225333	1
ENSG00000010539	ZNF200	30.183	28.1245	31.521	27.9316	-0.137758	1
ENSG00000010626	LRRC23	6.41751	5.8416	4.78721	4.1513	-0.171803	1
ENSG00000010704	HFE	50.8433	59.2169	54.6488	43.9218	-0.0315162	1
ENSG00000010803	SCMH1	18.2589	16.5826	21.6357	21.474	-0.0662996	1
ENSG00000010818	HIVEP2	7.32839	7.44333	6.09281	9.63512	0.340106	1
ENSG00000011007	TCEB3	74.4431	81.7353	97.9824	93.4299	0.0238273	1
ENSG00000011009	LYPLA2	20.7431	18.6083	17.9054	20.244	0.00431802	1
ENSG00000011021	CLCN6	17.0168	13.3792	8.82836	10.7626	-0.105428	1
ENSG00000011028	MRC2	13.3319	13.5676	7.83362	9.84012	0.138432	1
ENSG00000011105	TSPAN9	13.9529	14.5098	10.3205	11.7876	0.110026	1
ENSG00000011114	BTBD7	63.14	65.4825	66.0262	57.4007	-0.0713547	1
ENSG00000011132	APBA3	5.13401	4.19276	3.41944	4.71506	0.0411876	1
ENSG00000011143	MKS1	12.9592	11.7774	11.4396	12.1464	-0.0318047	1
ENSG00000011198	ABHD5	12.0484	11.9659	16.4755	14.3502	-0.111168	1
ENSG00000011243	AKAP8L	28.8581	26.3814	25.0551	25.6766	-0.0526495	1
ENSG00000011258	MBTD1	20.0392	17.9959	20.8275	20.1927	-0.0974841	1
ENSG00000011260	UTP18	81.3989	82.6304	112.904	102.758	-0.0668513	1
ENSG00000011275	RNF216	76.1821	78.0608	76.471	81.796	0.0664806	1
ENSG00000011295	TTC19	75.6852	77.7781	79.7661	66.2158	-0.109883	1
ENSG00000011304	PTBP1	261.627	235.596	239.236	294.23	0.0808844	1
ENSG00000011376	LARS2	125.535	143.543	123.162	113.264	0.0463911	1
ENSG00000011405	PIK3C2A	68.4811	66.5189	67.5805	77.286	0.0795719	1
ENSG00000011422	PLAUR	55.8531	52.9042	28.2881	37.208	0.0970031	1
ENSG00000011426	ANLN	387.742	414.612	431.408	361.624	-0.0774772	1
ENSG00000011451	WIZ	11.5515	9.46905	8.9527	12.9152	0.119254	1
ENSG00000011454	RABGAP1	44.0531	47.4395	41.3441	34.7479	-0.055259	1
ENSG00000011478	QPCTL	21.9438	21.8118	12.1235	13.7864	0.0594842	1
ENSG00000011485	PPP5C	59.3723	54.6943	60.3686	65.6521	0.00711472	1
ENSG00000011523	CEP68	20.5774	20.9167	22.5061	23.3703	0.0410004	1
ENSG00000011566	MAP4K3	28.5269	26.1459	31.6453	31.7241	-0.055385	1
ENSG00000011638	TMEM159	28.8167	36.7456	27.2311	20.5003	0.0309533	1
ENSG00000012048	BRCA1	74.2775	76.8359	107.495	116.595	0.0904338	1
ENSG00000012061	ERCC1	32.0048	29.3964	25.9877	36.0804	0.171911	1
ENSG00000012171	SEMA3B	2.73262	2.63814	1.18126	1.07626	-0.0964393	1
ENSG00000012174	MBTPS2	90.8389	107.646	100.904	74.1597	-0.0761517	1
ENSG00000012211	PRICKLE3	11.1789	9.98725	8.45533	11.2751	0.106718	1
ENSG00000012232	EXTL3	53.5759	54.0819	40.7224	47.3556	0.103216	1
ENSG00000012660	ELOVL5	361.824	440.852	358.481	283.723	0.00859229	1
ENSG00000012817	KDM5D	40.4096	38.5357	33.0753	34.4917	-0.0110203	1
ENSG00000012822	CALCOCO1	4.14033	3.29768	1.86515	2.92129	0.0240138	1
ENSG00000012963	UBR7	59.9934	61.9021	86.2319	66.6258	-0.184473	1
ENSG00000012983	MAP4K5	51.2987	49.7007	56.5761	69.2396	0.141136	1
ENSG00000013016	EHD3	4.18173	3.53323	3.41944	3.48504	-0.124058	1
ENSG00000013275	PSMC4	85.7462	79.9451	95.682	107.37	0.046274	1
ENSG00000013288	MAN2B2	38.1324	37.4522	27.2311	31.6216	0.076928	1
ENSG00000013297	CLDN11	6.2933	6.40692	5.78195	5.38132	-0.03644	1
ENSG00000013306	SLC25A39	102.515	83.0544	87.5997	113.674	0.0484709	1
ENSG00000013364	MVP	18.6729	14.8867	10.134	14.2477	0.00958622	1
ENSG00000013374	NUB1	51.7955	54.0348	62.4824	55.2482	-0.0629115	1
ENSG00000013375	PGM3	64.6306	68.1206	70.9377	69.2909	0.0201465	1
ENSG00000013392	RWDD2A	3.18805	2.9208	2.176	2.61378	0.0249881	1
ENSG00000013441	CLK1	28.1128	29.9618	38.795	44.8443	0.162738	1
ENSG00000013503	POLR3B	35.8139	38.3002	51.9754	50.3794	0.0164279	1
ENSG00000013523	ANGEL1	40.5338	39.1482	28.2881	29.9816	0.00413217	1
ENSG00000013561	RNF14	57.0952	51.7264	70.6269	63.0383	-0.153227	1
ENSG00000013563	DNASE1L1	110.837	104.913	63.2285	57.1445	-0.103716	1
ENSG00000013573	DDX11	28.4855	23.5548	28.6611	34.0817	0.011575	1
ENSG00000013583	HEBP1	8.19785	7.63177	7.77144	9.17386	0.0707485	1
ENSG00000013588	GPRC5A	244.859	258.632	135.845	197.264	0.259567	1
ENSG00000013810	TACC3	128.723	113.817	119.369	134.635	0.00167673	1
ENSG00000014123	UFL1	127.978	147.548	128.073	129.664	0.114643	1
ENSG00000014138	POLA2	29.562	31.4222	34.3809	32.1854	-0.00573554	1
ENSG00000014164	ZC3H3	4.67857	4.61675	3.35726	5.38132	0.298969	1
ENSG00000014216	CAPN1	37.5528	32.6941	29.718	29.7766	-0.109404	1
ENSG00000014641	MDH1	167.932	183.775	198.265	159.902	-0.091082	1
ENSG00000014824	SLC30A9	175.633	196.212	179.614	141.913	-0.0710728	1
ENSG00000014914	MTMR11	6.12769	6.7838	4.41418	5.02256	0.154745	1
ENSG00000014919	COX15	135.223	143.213	150.393	123.258	-0.0996376	1
ENSG00000015133	CCDC88C	34.2819	29.6791	26.4229	31.1091	-0.00145369	1
ENSG00000015153	YAF2	12.421	12.6725	15.232	13.9402	-0.0509498	1
ENSG00000015171	ZMYND11	61.1527	61.1013	73.3624	80.4635	0.0744306	1
ENSG00000015475	BID	50.512	53.4695	44.8257	43.3068	0.0208877	1
ENSG00000015479	MATR3	10.061	10.6468	12.1235	13.5302	0.127276	1
ENSG00000015532	XYLT2	73.0354	65.4825	38.5464	48.9444	0.0343936	1
ENSG00000015676	NUDCD3	102.97	100.391	94.0656	87.4848	-0.0689677	1
ENSG00000016391	CHDH	6.99716	5.70027	6.3415	5.38132	-0.269643	1
ENSG00000016864	GLT8D1	71.5449	84.1379	83.0612	61.8595	-0.0815815	1
ENSG00000017260	ATP2C1	165.779	198.662	166.931	129.562	-0.0194091	1
ENSG00000017483	SLC38A5	93.5301	93.8896	74.1085	90.9699	0.139858	1
ENSG00000017797	RALBP1	53.079	52.1033	58.1926	48.0218	-0.15122	1
ENSG00000018189	RUFY3	15.6919	14.9338	16.8485	15.7339	-0.0841753	1
ENSG00000018236	CNTN1	23.6827	25.2979	17.2837	12.7614	-0.107382	1
ENSG00000018408	WWTR1	75.8923	77.731	86.4806	68.1121	-0.153914	1
ENSG00000018510	AGPS	133.898	136.477	179.8	149.242	-0.134105	1
ENSG00000018610	CXorf56	31.1767	32.223	42.0901	38.3867	-0.050872	1
ENSG00000018699	TTC27	58.4201	63.8336	75.7249	68.9321	-0.0134017	1
ENSG00000019144	PHLDB1	21.9852	18.3728	13.5534	17.6302	0.0124033	1
ENSG00000019186	CYP24A1	7.07997	8.38552	5.53327	6.97009	0.276997	1
ENSG00000019485	PRDM11	3.7263	2.68525	2.85989	3.79255	-0.0392668	1
ENSG00000019549	SNAI2	8.15645	7.302	6.21715	5.22756	-0.201881	1
ENSG00000019995	ZRANB1	49.3113	53.4224	56.887	52.8394	0.00227638	1
ENSG00000020129	NCDN	12.0484	11.165	11.9991	15.9902	0.173738	1
ENSG00000020256	ZFP64	24.635	24.5441	26.1121	27.8291	0.0460722	1
ENSG00000020426	MNAT1	25.9185	33.4008	36.0595	32.1854	0.0855318	1
ENSG00000020577	SAMD4A	57.9232	50.7371	48.8047	78.926	0.279426	1
ENSG00000020922	MRE11A	37.1802	38.5357	44.0796	40.5392	-0.037569	1
ENSG00000021355	SERPINB1	125.907	122.579	79.7661	80.7197	-0.0173619	1
ENSG00000021574	SPAST	104.336	123.993	125.089	88.4586	-0.110105	1
ENSG00000021645	NRXN3	7.57681	7.302	5.28458	4.1513	-0.172218	1
ENSG00000021762	OSBPL5	63.4713	53.4695	29.8423	40.3855	0.00642904	1
ENSG00000021776	AQR	142.303	149.385	165.252	140.99	-0.0824208	1
ENSG00000021826	CPS1	2188.74	2539.54	2142.74	2037.57	0.0795794	1
ENSG00000022267	FHL1	6.00348	6.64247	5.71978	5.84257	0.0897679	1
ENSG00000022277	RTFDC1	58.4201	59.1698	72.2433	64.012	-0.0837591	1
ENSG00000022567	SLC45A4	13.2077	13.1436	9.01487	10.5064	0.0830165	1
ENSG00000022840	RNF10	92.7848	85.0801	95.4333	93.0711	-0.0792461	1
ENSG00000022976	ZNF839	18.1346	16.9124	18.4028	24.6516	0.185119	1
ENSG00000023041	ZDHHC6	73.9049	86.4934	88.4079	70.4696	-0.0472543	1
ENSG00000023171	GRAMD1B	641.337	666.037	349.901	313.808	-0.0167644	1
ENSG00000023191	RNH1	62.8088	52.6686	45.5717	63.6533	0.0996253	1
ENSG00000023228	NDUFS1	300.588	299.853	322.359	272.141	-0.122965	1
ENSG00000023287	RB1CC1	35.4826	38.9597	42.3388	60.527	0.355106	1
ENSG00000023318	ERP44	167.062	194.563	156.983	155.341	0.110703	1
ENSG00000023330	ALAS1	57.0124	61.7608	70.7512	76.4147	0.114024	1
ENSG00000023445	BIRC3	8.32206	7.11356	4.60069	10.0964	0.401203	1
ENSG00000023516	AKAP11	63.8439	67.8851	74.1085	78.7722	0.0890815	1
ENSG00000023572	GLRX2	33.2055	42.7285	48.8047	42.2818	0.0545885	1
ENSG00000023608	SNAPC1	35.3584	37.0282	30.2775	27.5216	-0.0249335	1
ENSG00000023697	DERA	58.8341	60.6773	68.9482	47.4068	-0.240089	1
ENSG00000023734	STRAP	152.364	154.614	186.017	170.87	-0.0556145	1
ENSG00000023839	ABCC2	630.283	666.225	664.614	727.759	0.106403	1
ENSG00000023892	DEF6	5.54804	3.76878	3.66812	4.2538	-0.214096	1
ENSG00000023902	PLEKHO1	5.50664	5.22918	5.28458	7.32884	0.214709	1
ENSG00000023909	GCLM	294.833	287.322	407.472	387.711	-0.0569154	1
ENSG00000024048	UBR2	63.9681	66.5189	57.8195	54.6332	-0.0080122	1
ENSG00000024526	DEPDC1	249.455	239.788	309.241	264.402	-0.147794	1
ENSG00000024862	CCDC28A	5.21682	6.87801	4.16549	5.02256	0.335871	1
ENSG00000025039	RRAGD	2.31859	2.59103	1.3056	2.10128	0.342422	1
ENSG00000025156	HSF2	24.1795	26.2401	27.542	28.1366	0.0740219	1
ENSG00000025293	PHF20	194.596	198.049	169.48	175.277	0.0359186	1
ENSG00000025434	NR1H3	8.28066	5.88871	7.95796	6.50883	-0.391141	1
ENSG00000025708	TYMP	4.43015	3.72167	2.79772	4.51006	0.168258	1
ENSG00000025770	NCAPH2	37.884	33.3065	37.7381	41.4105	-0.0179203	1
ENSG00000025772	TOMM34	57.5092	52.9513	65.3423	62.782	-0.0853964	1
ENSG00000025796	SEC63	55.5218	65.5296	59.0008	54.0182	0.0627068	1
ENSG00000025800	KPNA6	81.4403	82.3948	82.3151	77.4397	-0.0348077	1
ENSG00000026025	VIM	1202.23	1174.68	1273.77	1212.74	-0.0525354	1
ENSG00000026103	FAS	36.0623	44.7071	40.1628	28.7004	-0.0527896	1
ENSG00000026297	RNASET2	11.0961	8.95084	6.27933	6.76508	-0.153835	1
ENSG00000026508	CD44	194.927	223.959	149.523	153.444	0.131523	1
ENSG00000026559	KCNG1	44.6742	39.1953	29.0341	41.308	0.123645	1
ENSG00000026652	AGPAT4	8.86031	10.2228	6.7767	5.27882	-0.014847	1
ENSG00000026950	BTN3A1	28.4441	29.9618	21.5114	13.3764	-0.205446	1
ENSG00000027001	MIPEP	72.373	89.8382	73.3003	62.1158	0.061312	1
ENSG00000027075	PRKCH	2.35999	3.3919	2.85989	2.15253	0.0977224	1
ENSG00000027697	IFNGR1	68.6053	86.6347	74.2328	68.6758	0.121509	1
ENSG00000027847	B4GALT7	35.5654	29.3964	26.2364	28.1878	-0.105263	1
ENSG00000027869	SH2D2A	126.446	102.652	69.0104	69.1371	-0.186951	1
ENSG00000028116	VRK2	44.6328	44.0947	52.535	55.3507	0.0344646	1
ENSG00000028137	TNFRSF1B	9.56416	9.79882	6.15498	7.63634	0.142328	1
ENSG00000028203	VEZT	146.071	166.439	200.068	151.138	-0.123525	1
ENSG00000028310	BRD9	46.1233	40.7028	39.852	40.488	-0.0841366	1
ENSG00000028528	SNX1	49.0629	48.3816	49.7994	50.7381	0.0038096	1
ENSG00000028839	TBPL1	16.3129	17.0066	24.5578	19.9877	-0.138925	1
ENSG00000029153	ARNTL2	26.1255	25.5335	26.6716	23.0628	-0.118919	1
ENSG00000029363	BCLAF1	186.273	186.743	244.459	244.773	0.00296269	1
ENSG00000029364	SLC39A9	403.475	468.553	420.528	313.603	-0.0750947	1
ENSG00000029639	TFB1M	14.988	14.1329	16.1646	10.7114	-0.323798	1
ENSG00000029725	RABEP1	138.577	146.982	171.283	148.114	-0.0698177	1
ENSG00000029993	HMGB3	114.811	114.853	145.233	116.8	-0.166001	1
ENSG00000030066	NUP160	126.156	137.702	145.544	122.489	-0.0618499	1
ENSG00000030110	BAK1	17.0582	17.2893	16.2889	19.014	0.121008	1
ENSG00000030582	GRN	111.168	101.568	63.415	90.4061	0.135599	1
ENSG00000031003	FAM13B	39.5402	39.2424	42.0901	51.4044	0.15127	1
ENSG00000031081	ARHGAP31	5.46524	4.3812	4.78721	4.40755	-0.227529	1
ENSG00000031691	CENPQ	13.8701	15.2635	18.4028	15.8364	-0.0483663	1
ENSG00000031698	SARS	120.691	114.571	102.334	143.707	0.210977	1
ENSG00000031823	RANBP3	33.9921	29.0196	30.7749	30.4429	-0.124798	1
ENSG00000032219	ARID4A	12.2968	10.8352	14.7347	16.0414	-0.00642058	1
ENSG00000032389	TSSC1	33.2883	31.1395	32.5157	36.9005	0.0474171	1
ENSG00000032444	PNPLA6	47.5724	44.3302	27.2311	35.9779	0.0993632	1
ENSG00000032742	IFT88	18.6729	19.6447	25.5525	21.1153	-0.11339	1
ENSG00000033011	ALG1	90.8803	91.4399	83.6207	97.4787	0.113986	1
ENSG00000033030	ZCCHC8	54.1555	51.538	56.0787	58.8357	0.00190398	1
ENSG00000033050	ABCF2	142.51	143.637	166.682	192.344	0.120099	1
ENSG00000033100	CHPF2	134.809	122.438	94.8116	112.444	0.0316382	1
ENSG00000033170	FUT8	36.8489	45.2724	44.204	32.8517	-0.0508955	1
ENSG00000033178	UBA6	105.91	106.656	122.416	114.033	-0.0485125	1
ENSG00000033327	GAB2	2.60841	2.40259	2.23818	2.15253	-0.0978219	1
ENSG00000033627	ATP6V0A1	49.6012	53.7993	48.6182	46.3306	0.0278865	1
ENSG00000033800	PIAS1	23.7241	22.0473	27.915	23.2678	-0.186112	1
ENSG00000033867	SLC4A7	312.968	347.293	241.599	223.094	0.040449	1
ENSG00000034053	APBA2	30.5556	28.2658	25.0551	34.2867	0.166462	1
ENSG00000034152	MAP2K3	45.585	39.7135	39.5411	49.2519	0.0617673	1
ENSG00000034510	TMSB10	792.542	785.318	830.861	788.388	-0.0448248	1
ENSG00000034533	ASTE1	6.58313	7.63177	6.40367	6.66258	0.138192	1
ENSG00000034677	RNF19A	111.416	107.316	112.966	121.361	0.0273078	1
ENSG00000034693	PEX3	37.3872	46.0733	48.0586	34.8504	-0.0759697	1
ENSG00000034713	GABARAPL2	26.1669	29.208	32.9509	24.6516	-0.130934	1
ENSG00000035115	SH3YL1	7.36979	7.44333	8.9527	8.4051	-0.0370325	1
ENSG00000035141	FAM136A	82.8894	85.881	118.188	108.139	-0.0506703	1
ENSG00000035403	VCL	490.629	544.352	390.189	364.187	0.044609	1
ENSG00000035499	DEPDC1B	58.7099	59.7822	81.196	67.8558	-0.13083	1
ENSG00000035681	NSMAF	69.1021	73.2085	84.1181	83.641	0.0347671	1
ENSG00000035687	ADSS	89.5554	92.4292	125.96	107.985	-0.103894	1
ENSG00000035862	TIMP2	62.0222	69.0628	38.795	36.5417	0.0658793	1
ENSG00000035928	RFC1	109.926	101.898	122.975	112.649	-0.118027	1
ENSG00000036054	TBC1D23	26.2911	26.7112	29.4693	25.2666	-0.0992803	1
ENSG00000036257	CUL3	134.023	141.282	171.22	146.731	-0.0831753	1
ENSG00000036549	ZZZ3	74.2775	71.8894	85.0507	83.7435	-0.0332482	1
ENSG00000037042	TUBG2	6.99716	6.54825	8.14447	7.94385	-0.0599734	1
ENSG00000037241	RPL26L1	50.8847	55.5894	61.239	51.9169	-0.0589557	1
ENSG00000037280	FLT4	11.9656	10.8352	7.46059	10.9164	0.152842	1
ENSG00000037474	NSUN2	211.157	212.936	232.211	246.003	0.0499322	1
ENSG00000037637	FBXO42	12.5866	12.8609	13.4291	16.554	0.17754	1
ENSG00000037749	MFAP3	125.659	149.055	136.156	117.261	0.0250159	1
ENSG00000037757	MRI1	27.4504	23.0366	23.563	22.3965	-0.169439	1
ENSG00000037897	METTL1	15.1122	13.756	16.0403	18.2965	0.041153	1
ENSG00000037965	HOXC8	1.40771	1.17774	1.61646	1.38377	-0.230016	1
ENSG00000038002	AGA	66.1625	74.292	65.3423	61.8083	0.0497113	1
ENSG00000038210	PI4K2B	28.5683	28.6427	40.7845	25.0103	-0.366475	1
ENSG00000038219	BOD1L1	33.164	36.3687	35.5	44.0755	0.228856	1
ENSG00000038274	MAT2B	91.6255	91.3457	104.635	92.9174	-0.090317	1
ENSG00000038358	EDC4	74.1947	70.1934	71.4973	85.7936	0.0980578	1
ENSG00000038382	TRIO	347.953	355.019	329.82	349.068	0.0548736	1
ENSG00000038532	CLEC16A	21.4883	19.0794	17.7811	18.2452	-0.0767032	1
ENSG00000039123	SKIV2L2	157.001	162.199	198.762	186.604	-0.0280516	1
ENSG00000039139	DNAH5	3.35367	2.73236	3.48161	3.12629	-0.22158	1
ENSG00000039319	ZFYVE16	83.2206	84.2792	97.4228	108.908	0.0973432	1
ENSG00000039560	RAI14	54.3625	50.9256	65.6532	69.6496	0.0074292	1
ENSG00000039650	PNKP	11.8413	9.51616	10.134	9.63512	-0.202783	1
ENSG00000040199	PHLPP2	59.8278	65.0585	72.5542	59.6557	-0.0845742	1
ENSG00000040275	SPDL1	52.7892	52.9513	82.3773	71.4946	-0.117822	1
ENSG00000040341	STAU2	23.5999	24.5913	29.345	21.7815	-0.187792	1
ENSG00000040487	PQLC2	16.1059	14.2271	10.507	13.5302	0.05294	1
ENSG00000040531	CTNS	19.9978	19.0794	16.5376	21.7303	0.155453	1
ENSG00000040608	RTN4R	5.13401	4.14565	1.7408	1.99877	-0.176417	1
ENSG00000040633	PHF23	33.9507	34.4843	40.3493	43.1018	0.0636918	1
ENSG00000040731	CDH10	34.3233	39.7135	47.6234	30.5966	-0.218113	1
ENSG00000040933	INPP4A	37.3872	37.2167	31.1479	30.9041	-0.0103503	1
ENSG00000041353	RAB27B	99.3265	92.335	89.0297	98.2987	0.0168491	1
ENSG00000041357	PSMA4	211.074	225.09	313.593	245.388	-0.156847	1
ENSG00000041802	LSG1	96.3455	102.464	101.277	93.2761	-0.0134891	1
ENSG00000041880	PARP3	7.61821	7.16067	5.78195	6.56008	0.0254761	1
ENSG00000041988	THAP3	10.0196	8.7624	7.33624	10.6089	0.149078	1
ENSG00000042088	TDP1	54.1555	52.7629	64.0367	51.1481	-0.184385	1
ENSG00000042286	AIFM2	75.8509	65.3882	67.2696	79.4385	0.0160718	1
ENSG00000042317	SPATA7	23.1859	22.754	26.1742	25.7791	-0.0227922	1
ENSG00000042429	MED17	33.4953	34.6256	45.8204	41.8205	-0.0508508	1
ENSG00000042445	RETSAT	74.1119	78.8145	53.5297	49.5594	0.00737956	1
ENSG00000042493	CAPG	29.0237	21.5762	18.6515	16.0927	-0.342953	1
ENSG00000042753	AP2S1	65.4586	56.3903	56.1409	58.682	-0.0809403	1
ENSG00000043093	DCUN1D1	42.397	41.221	53.4054	55.0432	0.00825741	1
ENSG00000043143	JADE2	25.7115	26.5699	33.2618	28.6491	-0.0918138	1
ENSG00000043355	ZIC2	5.58945	5.04074	4.97372	6.56008	0.129102	1
ENSG00000043514	TRIT1	45.4194	47.9577	52.0998	43.5118	-0.0907896	1
ENSG00000043591	ADRB1	4.05752	5.32339	3.54378	4.10005	0.305784	1
ENSG00000044090	CUL7	15.2778	10.8823	10.0096	10.7114	-0.23504	1
ENSG00000044115	CTNNA1	543.791	542.044	549.97	542.488	-0.0122139	1
ENSG00000044446	PHKA2	23.0202	20.0216	20.1436	22.1403	-0.0367211	1
ENSG00000044459	CNTLN	11.7585	11.3063	16.3511	15.1189	-0.0844138	1
ENSG00000044524	EPHA3	27.2434	31.2808	34.07	31.2116	0.0302552	1
ENSG00000044574	HSPA5	2100.18	2350.35	1979.04	2326.73	0.197297	1
ENSG00000046604	DSG2	291.396	347.104	292.02	247.951	0.0285784	1
ENSG00000046647	GEMIN8	11.2203	9.04506	9.01487	8.76386	-0.1898	1
ENSG00000046651	OFD1	24.3037	21.906	29.345	31.9804	0.0074772	1
ENSG00000047056	WDR37	14.988	13.332	12.31	10.8651	-0.177222	1
ENSG00000047188	YTHDC2	49.6426	46.3559	50.5455	48.9956	-0.0713042	1
ENSG00000047230	CTPS2	27.9472	28.7369	32.9509	24.3953	-0.194195	1
ENSG00000047249	ATP6V1H	34.7788	39.0539	40.598	37.823	0.0304545	1
ENSG00000047315	POLR2B	175.343	193.103	217.6	190.396	-0.0346121	1
ENSG00000047346	FAM214A	3.93331	4.66386	4.22767	5.02256	0.249918	1
ENSG00000047365	ARAP2	13.1663	13.5676	11.3774	18.604	0.386351	1
ENSG00000047410	TPR	155.718	175.342	223.32	290.489	0.297727	1
ENSG00000047578	KIAA0556	19.3767	16.5826	13.3669	19.6802	0.140581	1
ENSG00000047579	DTNBP1	1.07649	1.36618	1.55429	1.38377	0.0931171	1
ENSG00000047597	XK	4.34735	4.71097	3.35726	5.07381	0.333563	1
ENSG00000047621	C12orf4	12.835	12.5783	19.211	18.7577	-0.028306	1
ENSG00000047634	SCML1	40.451	42.2574	44.0175	42.2305	0.00138011	1
ENSG00000047644	WWC3	32.6258	32.0817	27.4798	37.2592	0.203495	1
ENSG00000047849	MAP4	102.846	99.3072	87.1645	99.2725	0.0627728	1
ENSG00000047932	GOPC	42.6454	49.3238	57.3843	56.0169	0.0767637	1
ENSG00000048028	USP28	47.1998	48.7585	54.2758	46.2281	-0.0938081	1
ENSG00000048140	TSPAN17	63.3471	57.992	46.0069	54.1207	0.0338154	1
ENSG00000048162	NOP16	67.1562	68.6859	81.4447	90.6624	0.101398	1
ENSG00000048342	CC2D2A	13.5803	14.6511	16.4133	19.9365	0.207814	1
ENSG00000048392	RRM2B	47.9864	47.0155	51.2294	46.4331	-0.0856558	1
ENSG00000048405	ZNF800	43.0594	43.0111	46.9395	45.7668	-0.0189446	1
ENSG00000048471	SNX29	12.5038	11.8716	9.20139	10.3014	0.0240786	1
ENSG00000048544	MRPS10	56.8467	60.0177	74.2328	68.1121	-0.0312928	1
ENSG00000048649	RSF1	16.1473	17.195	18.6515	25.7791	0.305489	1
ENSG00000048707	VPS13D	71.3793	74.2449	62.8554	61.0908	0.0111811	1
ENSG00000048828	FAM120A	330.73	320.11	341.135	314.115	-0.0831206	1
ENSG00000048991	R3HDM1	23.6827	22.4713	28.8476	23.6265	-0.185524	1
ENSG00000049130	KITLG	65.5828	69.4397	84.9263	75.5947	-0.052069	1
ENSG00000049167	ERCC8	19.0869	19.5976	27.7285	23.319	-0.122117	1
ENSG00000049192	ADAMTS6	11.8827	10.1286	6.90104	11.5826	0.199512	1
ENSG00000049239	H6PD	56.5155	54.1761	34.8782	38.3867	0.0164515	1
ENSG00000049245	VAMP3	45.2124	51.1611	60.3686	47.3043	-0.0983519	1
ENSG00000049246	PER3	2.4842	2.68525	2.42469	2.51128	0.0812029	1
ENSG00000049449	RCN1	360.54	419.842	374.708	335.845	0.0396536	1
ENSG00000049541	RFC2	75.7681	74.1978	93.133	80.8222	-0.122724	1
ENSG00000049618	ARID1B	19.6666	20.634	19.584	24.6003	0.204073	1
ENSG00000049656	CLPTM1L	453.822	482.026	389.256	385.661	0.041404	1
ENSG00000049759	NEDD4L	26.4153	30.5271	27.2933	25.2153	0.054592	1
ENSG00000049860	HEXB	366.626	449.332	355.808	322.11	0.0947222	1
ENSG00000049883	PTCD2	35.11	37.5935	48.4316	35.4654	-0.190417	1
ENSG00000050130	JKAMP	240.719	298.157	281.264	221.966	-0.00484253	1
ENSG00000050344	NFE2L3	65.086	74.9515	64.7206	47.9706	-0.0781951	1
ENSG00000050393	MCUR1	38.4637	37.8762	51.9754	39.3092	-0.226104	1
ENSG00000050405	LIMA1	49.3113	57.4738	46.8773	40.5905	0.0279847	1
ENSG00000050426	LETMD1	55.9359	52.8571	50.7942	52.4294	-0.0205936	1
ENSG00000050555	LAMC3	42.7282	39.9019	28.2881	41.2568	0.188761	1
ENSG00000050730	TNIP3	1.49052	1.22485	1.92732	2.10128	-0.0292738	1
ENSG00000050748	MAPK9	80.281	83.6197	94.5008	81.5398	-0.0807258	1
ENSG00000050820	BCAR1	12.1312	9.89303	7.14973	14.0427	0.301342	1
ENSG00000051009	FAM160A2	13.5389	12.013	9.57442	11.9926	0.0465943	1
ENSG00000051108	HERPUD1	119.614	128.327	109.422	173.125	0.395866	1
ENSG00000051128	HOMER3	3.43647	2.96791	1.92732	2.56253	0.0190726	1
ENSG00000051180	RAD51	16.8925	17.3835	22.9413	18.5527	-0.145063	1
ENSG00000051341	POLQ	31.6735	28.2187	45.2609	40.488	-0.161181	1
ENSG00000051382	PIK3CB	11.5515	13.2849	13.7399	12.0439	0.00718245	1
ENSG00000051523	CYBA	92.6606	75.2813	48.2451	64.1145	-0.0172401	1
ENSG00000051596	THOC3	19.1283	16.4884	21.2005	19.4752	-0.164044	1
ENSG00000051620	HEBP2	34.3647	38.9597	39.6033	32.2879	-0.051995	1
ENSG00000051825	MPHOSPH9	107.11	99.0717	126.581	114.801	-0.127314	1
ENSG00000052126	PLEKHA5	69.5576	68.4504	70.6269	61.757	-0.106221	1
ENSG00000052723	SIKE1	51.6713	48.099	67.5183	64.2683	-0.0838192	1
ENSG00000052749	RRP12	120.277	111.32	109.422	161.696	0.248766	1
ENSG00000052795	FNIP2	12.2554	12.7667	12.9939	10.8651	-0.0931304	1
ENSG00000052802	MSMO1	248.13	310.076	208.586	105.166	-0.137322	1
ENSG00000052841	TTC17	148.141	171.385	152.196	178.711	0.221229	1
ENSG00000053108	FSTL4	58.7513	60.112	48.4316	41.4618	-0.0782471	1
ENSG00000053254	FOXN3	6.66593	6.45403	4.41418	4.86881	0.0229141	1
ENSG00000053371	AKR7A2	20.2048	15.6404	17.1593	17.8865	-0.160057	1
ENSG00000053372	MRTO4	115.681	112.498	131.493	116.903	-0.107198	1
ENSG00000053501	USE1	8.7361	7.25489	8.33099	9.53262	-0.0265708	1
ENSG00000053747	LAMA3	12.5452	11.4477	6.27933	9.63512	0.153181	1
ENSG00000053770	AP5M1	53.7415	56.5316	73.9841	66.7283	-0.0498307	1
ENSG00000053900	ANAPC4	36.2693	37.358	43.5823	36.6955	-0.106535	1
ENSG00000054116	TRAPPC3	47.4896	54.9299	52.7215	46.6893	0.0214025	1
ENSG00000054118	THRAP3	157.871	154.426	190.991	173.637	-0.0882903	1
ENSG00000054148	PHPT1	37.1388	35.662	31.2723	41.1543	0.16469	1
ENSG00000054267	ARID4B	37.5942	34.8141	38.7329	49.2519	0.138993	1
ENSG00000054277	OPN3	221.383	251.754	235.568	142.169	-0.213921	1
ENSG00000054282	SDCCAG8	23.4757	23.0366	24.4334	23.8315	-0.0310844	1
ENSG00000054356	PTPRN	7.90803	8.7624	6.46584	8.91761	0.291031	1
ENSG00000054392	HHAT	6.16909	7.34911	3.17075	3.02379	0.143651	1
ENSG00000054523	KIF1B	82.1856	85.5512	78.9579	74.1597	-0.0129525	1
ENSG00000054598	FOXC1	68.1084	68.8273	63.6015	64.217	0.0141053	1
ENSG00000054611	TBC1D22A	11.1375	9.32772	10.134	13.1714	0.0771685	1
ENSG00000054654	SYNE2	32.8328	34.343	35.7486	47.1506	0.249167	1
ENSG00000054690	PLEKHH1	9.48136	7.91443	7.95796	10.0964	0.0400457	1
ENSG00000054793	ATP9A	96.0557	99.7312	77.4036	79.0797	0.0430625	1
ENSG00000054965	FAM168A	12.1726	12.3898	12.3721	9.07136	-0.191618	1
ENSG00000054967	RELT	16.3543	15.7817	12.2478	12.8639	-0.00267098	1
ENSG00000054983	GALC	853.653	938.661	760.731	698.444	0.0201366	1
ENSG00000055044	NOP58	228.463	229.047	276.166	300.636	0.0700955	1
ENSG00000055070	SZRD1	73.201	66.4718	77.5279	79.6435	-0.0447156	1
ENSG00000055130	CUL1	122.305	123.569	146.974	141.452	-0.0225182	1
ENSG00000055147	FAM114A2	26.8293	31.3279	33.6348	27.9828	-0.0244822	1
ENSG00000055163	CYFIP2	15.4434	15.9231	10.2583	12.8127	0.154623	1
ENSG00000055208	TAB2	16.5199	15.7817	16.4755	14.4014	-0.128092	1
ENSG00000055211	GINM1	89.7624	100.721	89.5892	64.0633	-0.121882	1
ENSG00000055332	EIF2AK2	95.269	103.312	125.089	111.316	-0.0370321	1
ENSG00000055483	USP36	51.9612	45.0369	40.225	55.2482	0.119267	1
ENSG00000055609	KMT2C	58.0888	61.007	57.26	61.3983	0.0855121	1
ENSG00000055917	PUM2	103.881	108.541	126.395	118.901	-0.0171446	1
ENSG00000055950	MRPL43	53.1204	53.4695	57.26	54.3257	-0.0334818	1
ENSG00000056050	HPF1	19.0041	18.3728	27.3555	19.014	-0.305847	1
ENSG00000056097	ZFR	168.139	166.674	221.517	248.617	0.0921799	1
ENSG00000056277	ZNF280C	34.6132	31.9404	42.3388	40.5392	-0.0848861	1
ENSG00000056558	TRAF1	3.27086	3.58034	1.80297	2.05003	0.134715	1
ENSG00000056586	RC3H2	139.198	142.365	148.341	150.882	0.0285466	1
ENSG00000056736	IL17RB	3.97472	4.23987	4.60069	3.7413	-0.0971629	1
ENSG00000056972	TRAF3IP2	20.9087	16.771	18.5271	17.4765	-0.206064	1
ENSG00000056998	GYG2	27.3676	23.6491	24.993	18.9627	-0.297703	1
ENSG00000057019	DCBLD2	270.571	315.164	198.327	194.24	0.11934	1
ENSG00000057252	SOAT1	260.551	312.149	320.557	243.44	-0.0644481	1
ENSG00000057294	PKP2	5.71366	7.82021	6.65236	5.63757	0.128987	1
ENSG00000057608	GDI2	257.736	284.448	352.699	289.925	-0.0874959	1
ENSG00000057663	ATG5	22.7304	27.0881	29.0341	24.2415	-0.00831416	1
ENSG00000057757	PITHD1	56.8881	58.3218	73.3624	72.2634	0.00484077	1
ENSG00000057935	MTA3	22.275	24.1673	24.1847	23.1653	0.0284136	1
ENSG00000058056	USP13	25.0076	25.9574	30.6506	25.9841	-0.0967349	1
ENSG00000058063	ATP11B	159.237	190.37	146.476	127.614	0.0567594	1
ENSG00000058085	LAMC2	6.08629	6.64247	4.78721	5.22756	0.12001	1
ENSG00000058262	SEC61A1	399.997	445.139	390.313	455.823	0.189009	1
ENSG00000058272	PPP1R12A	94.8964	90.0737	105.567	103.68	-0.0487334	1
ENSG00000058453	CROCC	3.8091	3.72167	2.67338	3.17754	0.0737186	1
ENSG00000058600	POLR3E	73.9877	72.6902	67.9535	86.3573	0.16336	1
ENSG00000058668	ATP2B4	34.6132	33.9661	30.5262	20.7565	-0.251426	1
ENSG00000058673	ZC3H11A	248.503	251.472	237.433	244.927	0.0306516	1
ENSG00000058729	RIOK2	44.6328	49.5594	63.3528	53.9157	-0.0594588	1
ENSG00000058799	YIPF1	13.9115	13.756	12.8073	10.8139	-0.121628	1
ENSG00000058804	NDC1	300.133	376.501	391.432	308.375	-0.0137109	1
ENSG00000058866	DGKG	23.7241	22.9424	31.2101	33.8767	0.0502463	1
ENSG00000059122	FLYWCH1	36.6833	27.8889	21.0762	33.4667	0.082656	1
ENSG00000059145	UNKL	64.0509	57.0969	51.9754	62.4745	0.0416136	1
ENSG00000059377	TBXAS1	4.55436	3.01502	3.91681	4.2538	-0.229556	1
ENSG00000059378	PARP12	23.8897	18.6554	22.3818	27.1116	-0.0176265	1
ENSG00000059573	ALDH18A1	394.863	462.382	360.284	354.757	0.113775	1
ENSG00000059588	TARBP1	148.472	155.792	157.729	121.003	-0.145334	1
ENSG00000059691	GATB	46.8271	47.2981	47.9343	40.078	-0.116441	1
ENSG00000059728	MXD1	1.94596	1.83728	1.80297	5.17631	0.894043	1
ENSG00000059758	CDK17	46.9099	46.4502	52.4728	48.5343	-0.0642104	1
ENSG00000059769	DNAJC25	70.5926	81.3113	67.1453	49.6106	-0.0730056	1
ENSG00000059804	SLC2A3	313.878	351.438	192.483	157.134	0.00615575	1
ENSG00000060069	CTDP1	23.5585	21.5762	15.6672	25.3691	0.253079	1
ENSG00000060138	YBX3	106.903	101.851	101.277	126.538	0.133235	1
ENSG00000060237	WNK1	104.005	104.442	106.873	100.092	-0.0438756	1
ENSG00000060339	CCAR1	84.4627	86.1165	125.897	161.183	0.233811	1
ENSG00000060491	OGFR	42.0658	37.2167	33.8835	44.6906	0.10623	1
ENSG00000060642	PIGV	19.0041	22.5655	17.9676	12.7614	-0.0649507	1
ENSG00000060656	PTPRU	23.4343	23.8846	14.6725	20.3465	0.209307	1
ENSG00000060688	SNRNP40	57.2194	59.8293	74.0463	76.6709	0.0574784	1
ENSG00000060749	QSER1	37.5528	38.9126	45.1365	48.3293	0.0787307	1
ENSG00000060762	MPC1	18.1761	18.5612	22.3196	16.6565	-0.197526	1
ENSG00000060971	ACAA1	14.4498	13.4734	9.88528	12.5052	0.0865906	1
ENSG00000060982	BCAT1	92.7434	93.7012	115.142	135.302	0.140045	1
ENSG00000061273	HDAC7	23.8069	22.0473	20.7653	30.6991	0.240309	1
ENSG00000061656	SPAG4	3.43647	2.11994	2.176	1.69127	-0.573558	1
ENSG00000061676	NCKAP1	417.801	439.91	418.477	404.675	0.0142824	1
ENSG00000061794	MRPS35	120.152	129.976	166.247	131.817	-0.128789	1
ENSG00000061918	GUCY1B3	2.02876	3.3919	3.23292	1.69127	-0.025936	1
ENSG00000061936	SFSWAP	42.3142	41.3623	37.9868	46.4843	0.127985	1
ENSG00000061938	TNK2	9.10873	5.79449	4.97372	7.12384	-0.138133	1
ENSG00000061987	MON2	60.4902	61.6195	58.5034	58.3745	0.0118706	1
ENSG00000062194	GPBP1	93.1574	98.1295	112.531	108.6	0.00805195	1
ENSG00000062282	DGAT2	8.57048	10.1286	3.97898	6.91884	0.429546	1
ENSG00000062370	ZNF112	4.26454	4.19276	4.28984	4.0488	-0.0530008	1
ENSG00000062485	CS	362.031	376.312	346.233	293.82	-0.0798315	1
ENSG00000062598	ELMO2	21.7367	21.1994	24.9308	25.0103	-0.0124924	1
ENSG00000062650	WAPL	128.392	129.081	153.564	148.166	-0.0238197	1
ENSG00000062716	VMP1	218.361	261.27	223.693	206.694	0.0823055	1
ENSG00000062725	APPBP2	49.477	51.6322	55.1462	47.8681	-0.0711844	1
ENSG00000062822	POLD1	35.4826	27.7476	26.9825	36.593	0.0392124	1
ENSG00000063046	EIF4B	704.312	694.303	842.798	777.831	-0.0715806	1
ENSG00000063176	SPHK2	5.13401	4.14565	4.91155	6.30383	0.0522114	1
ENSG00000063177	RPL18	657.402	610.212	481.394	564.269	0.0443275	1
ENSG00000063241	ISOC2	30.4314	24.3557	22.4439	29.6229	0.0255106	1
ENSG00000063244	U2AF2	122.554	100.909	109.36	139.453	0.0510614	1
ENSG00000063245	EPN1	29.1065	22.9895	20.3923	28.7516	0.0592545	1
ENSG00000063322	MED29	19.7494	18.891	19.584	24.9078	0.154096	1
ENSG00000063438	AHRR	9.19153	7.53755	4.66287	6.15008	-0.0263687	1
ENSG00000063587	ZNF275	18.5901	17.2893	12.7452	15.2214	0.0487534	1
ENSG00000063601	MTMR1	41.7759	43.388	57.1978	48.9956	-0.0974454	1
ENSG00000063660	GPC1	632.146	593.488	457.645	620.85	0.155893	1
ENSG00000063761	ADCK1	15.1536	13.2378	8.76619	12.3002	0.0855109	1
ENSG00000063854	HAGH	22.275	20.2101	13.056	16.6052	0.0548098	1
ENSG00000063978	RNF4	86.2431	88.6133	95.5577	95.0187	0.0149637	1
ENSG00000064012	CASP8	76.2235	81.0287	83.0612	85.7936	0.0671673	1
ENSG00000064042	LIMCH1	845.497	954.16	741.52	827.8	0.16709	1
ENSG00000064102	ASUN	66.7835	69.9108	83.9938	71.1359	-0.0948658	1
ENSG00000064115	TM7SF3	136.465	158.477	132.612	98.35	-0.0670678	1
ENSG00000064199	SPA17	7.32839	9.65749	12.4343	8.81511	-0.0869225	1
ENSG00000064205	WISP2	8.28066	5.8416	3.85464	4.61256	-0.226788	1
ENSG00000064309	CDON	4.30594	4.47542	4.84938	3.28004	-0.231153	1
ENSG00000064313	TAF2	44.0531	44.1889	60.3686	56.6832	-0.0482087	1
ENSG00000064393	HIPK2	65.8313	62.3732	53.0945	65.0371	0.097841	1
ENSG00000064419	TNPO3	129.882	137.231	144.673	138.582	0.0069841	1
ENSG00000064490	RFXANK	14.2013	12.1072	14.859	17.169	0.010233	1
ENSG00000064545	TMEM161A	61.7323	52.9513	42.5875	54.0694	0.0342987	1
ENSG00000064601	CTSA	145.077	144.203	104.448	126.794	0.118215	1
ENSG00000064607	SUGP2	97.9602	92.0523	77.4658	87.0236	0.0285624	1
ENSG00000064651	SLC12A2	338.679	371.601	355.248	296.639	-0.0542997	1
ENSG00000064652	SNX24	10.9719	13.0494	12.6208	12.8639	0.139166	1
ENSG00000064666	CNN2	43.4321	36.8398	34.5674	42.8455	0.0280976	1
ENSG00000064687	ABCA7	18.7971	15.6875	9.51225	10.5576	-0.115019	1
ENSG00000064703	DDX20	40.2854	41.6921	50.5455	45.1006	-0.0635455	1
ENSG00000064726	BTBD1	118.165	121.119	158.102	117.671	-0.209424	1
ENSG00000064932	SBNO2	50.8019	38.7713	27.7285	46.9456	0.122972	1
ENSG00000064933	PMS1	31.2181	31.1395	39.4168	43.768	0.0862563	1
ENSG00000064961	HMG20B	62.6846	47.7692	33.9457	49.2519	0.00350827	1
ENSG00000064989	CALCRL	4.71998	4.61675	4.04115	3.17754	-0.170574	1
ENSG00000064995	TAF11	22.0266	23.2722	29.718	24.7028	-0.105336	1
ENSG00000064999	ANKS1A	14.6982	14.8396	12.0613	13.4277	0.0747352	1
ENSG00000065000	AP3D1	104.957	98.7419	88.3458	100.502	0.0428331	1
ENSG00000065029	ZNF76	12.5866	10.6468	12.8073	15.5289	0.0426096	1
ENSG00000065054	SLC9A3R2	9.60557	8.33841	6.90104	7.48259	-0.0690562	1
ENSG00000065057	NTHL1	15.7747	14.7453	14.2995	18.1427	0.126156	1
ENSG00000065060	UHRF1BP1	58.9997	54.6943	50.2968	55.3507	0.00855254	1
ENSG00000065135	GNAI3	127.398	146.652	165.936	133.713	-0.0644859	1
ENSG00000065150	IPO5	356.482	388.749	457.893	403.547	-0.0394107	1
ENSG00000065154	OAT	114.977	130.635	145.668	110.24	-0.112929	1
ENSG00000065183	WDR3	107.814	107.175	133.918	124.437	-0.0610867	1
ENSG00000065243	PKN2	104.005	99.4014	109.919	96.4537	-0.126998	1
ENSG00000065268	WDR18	31.2181	22.754	23.8117	38.1817	0.144106	1
ENSG00000065308	TRAM2	37.0974	38.9126	34.0078	35.6704	0.0679091	1
ENSG00000065325	GLP2R	188.095	200.829	187.199	182.452	0.0304183	1
ENSG00000065328	MCM10	56.3085	61.1955	91.8896	84.666	-0.0219849	1
ENSG00000065357	DGKA	6.2933	6.50114	5.0359	3.43379	-0.191046	1
ENSG00000065361	ERBB3	2.31859	2.4497	1.36777	1.23002	-0.0171125	1
ENSG00000065413	ANKRD44	4.22314	3.29768	4.47635	3.48504	-0.356263	1
ENSG00000065427	KARS	216.788	210.486	233.019	234.215	-0.0163621	1
ENSG00000065457	ADAT1	13.4975	10.2699	13.056	15.0164	-0.0725105	1
ENSG00000065485	PDIA5	46.9514	52.5273	36.246	37.5667	0.113662	1
ENSG00000065491	TBC1D22B	7.86663	7.34911	6.7767	8.81511	0.136163	1
ENSG00000065518	NDUFB4	70.1372	79.2856	81.5069	67.9071	-0.0418561	1
ENSG00000065526	SPEN	43.8461	42.0218	45.0122	49.2519	0.0386349	1
ENSG00000065548	ZC3H15	145.16	145.428	185.706	182.247	-0.0135381	1
ENSG00000065559	MAP2K4	43.5977	44.6129	57.0735	46.7918	-0.137205	1
ENSG00000065600	TMEM206	68.2327	74.2449	49.302	59.7582	0.187748	1
ENSG00000065613	SLK	140.026	141.188	157.108	198.391	0.192764	1
ENSG00000065615	CYB5R4	25.1732	25.2037	29.7802	26.7528	-0.0784725	1
ENSG00000065621	GSTO2	26.8293	27.1823	21.5114	19.9365	-0.0388155	1
ENSG00000065665	SEC61A2	9.9782	10.1286	7.52276	6.25258	-0.0990516	1
ENSG00000065802	ASB1	32.957	31.1395	23.6252	33.8254	0.195102	1
ENSG00000065809	FAM107B	72.166	76.3648	69.8808	59.3482	-0.0656797	1
ENSG00000065833	ME1	208.962	209.497	268.146	230.782	-0.115503	1
ENSG00000065882	TBC1D1	39.9956	39.4308	43.2092	37.413	-0.113684	1
ENSG00000065883	CDK13	60.7801	65.0114	63.6015	68.3171	0.100519	1
ENSG00000065911	MTHFD2	430.884	432.514	448.07	567.191	0.185704	1
ENSG00000065923	SLC9A7	67.5702	75.5639	49.4264	40.1805	-0.0160277	1
ENSG00000065970	FOXJ2	6.45892	7.11356	7.83362	7.8926	0.0761379	1
ENSG00000065978	YBX1	526.981	510.245	622.213	608.55	-0.0385858	1
ENSG00000065989	PDE4A	3.60209	3.15635	3.73029	3.33129	-0.175029	1
ENSG00000066027	PPP2R5A	55.6874	53.7993	61.1768	55.9144	-0.0902911	1
ENSG00000066044	ELAVL1	63.9267	64.4461	74.5437	67.8558	-0.0647985	1
ENSG00000066084	DIP2B	70.3442	72.2663	79.9526	78.1572	0.00193496	1
ENSG00000066117	SMARCD1	56.4327	50.0776	58.1304	62.577	-0.0243581	1
ENSG00000066135	KDM4A	29.7276	27.1352	22.9413	24.6516	-0.0276533	1
ENSG00000066136	NFYC	18.8385	17.5719	18.465	18.809	-0.0368177	1
ENSG00000066230	SLC9A3	8.57048	6.97223	5.22241	7.32884	0.0390649	1
ENSG00000066248	NGEF	3.39507	2.68525	1.05692	2.40878	0.161884	1
ENSG00000066279	ASPM	153.234	179.865	203.923	256.766	0.290163	1
ENSG00000066322	ELOVL1	127.025	139.35	114.769	112.393	0.0579467	1
ENSG00000066379	ZNRD1	14.3669	15.2635	15.0455	19.9877	0.261153	1
ENSG00000066422	ZBTB11	52.7064	47.5808	59.7469	65.3446	0.00647491	1
ENSG00000066427	ATXN3	21.2813	21.6233	23.3143	23.4215	0.0157778	1
ENSG00000066455	GOLGA5	61.4839	64.87	65.591	55.7094	-0.074923	1
ENSG00000066557	LRRC40	33.5367	32.0346	42.0901	36.4904	-0.140049	1
ENSG00000066583	ISOC1	47.0342	48.7585	50.6076	36.3879	-0.196359	1
ENSG00000066629	EML1	18.4659	20.3514	22.9413	25.4203	0.147286	1
ENSG00000066651	TRMT11	38.5879	39.8548	33.0753	35.6704	0.0742312	1
ENSG00000066654	THUMPD1	117.42	116.691	138.27	133.354	-0.0317078	1
ENSG00000066697	MSANTD3	70.3028	70.5703	78.8335	78.5672	0.000637305	1
ENSG00000066735	KIF26A	104.875	94.6434	72.2433	98.9137	0.126507	1
ENSG00000066739	ATG2B	28.5683	30.3386	33.4483	32.0316	0.0102607	1
ENSG00000066777	ARFGEF1	61.8151	62.3732	58.6899	57.3495	-0.00968697	1
ENSG00000066827	ZFAT	5.09261	5.32339	5.84413	5.99632	0.0537038	1
ENSG00000066855	MTFR1	77.3828	81.8766	81.5691	65.8571	-0.105016	1
ENSG00000066926	FECH	73.9463	71.277	99.1636	78.0547	-0.212054	1
ENSG00000066933	MYO9A	64.3407	62.3732	58.3169	52.2244	-0.0985004	1
ENSG00000067048	DDX3Y	163.336	163.706	153.75	164.515	0.0496008	1
ENSG00000067057	PFKP	322.615	289.819	251.546	273.473	-0.0279123	1
ENSG00000067064	IDI1	140.978	152.211	155.242	97.0687	-0.248489	1
ENSG00000067066	SP100	34.7788	37.8291	38.049	40.7443	0.110567	1
ENSG00000067082	KLF6	36.7247	35.4265	31.0858	41.2568	0.174903	1
ENSG00000067113	PLPP1	32.0048	34.2487	29.2828	22.704	-0.105825	1
ENSG00000067141	NEO1	18.2175	17.4306	15.4807	14.4527	-0.0821729	1
ENSG00000067167	TRAM1	206.023	254.911	247.94	204.08	0.0162923	1
ENSG00000067177	PHKA1	73.4495	78.1079	65.2801	65.7033	0.0513355	1
ENSG00000067182	TNFRSF1A	275.291	289.395	185.147	171.126	2.89697e-05	1
ENSG00000067191	CACNB1	2.77402	3.01502	3.29509	4.10005	0.234931	1
ENSG00000067208	EVI5	37.7184	31.1866	35.9352	37.5155	-0.101379	1
ENSG00000067221	STOML1	10.1438	9.04506	7.70927	8.66136	-0.0185359	1
ENSG00000067225	PKM	1490.85	1325.81	1429.32	1592.41	-0.000991632	1
ENSG00000067248	DHX29	92.4122	93.4185	126.146	107.626	-0.119582	1
ENSG00000067334	DNTTIP2	100.072	97.9882	125.524	137.557	0.0627374	1
ENSG00000067365	METTL22	15.609	13.0965	12.1235	14.8114	0.00296545	1
ENSG00000067369	TP53BP1	95.2276	97.3286	106.562	99.9387	-0.0321808	1
ENSG00000067533	RRP15	82.641	83.9495	116.82	112.444	-0.02149	1
ENSG00000067560	RHOA	397.348	396.569	461.872	368.543	-0.167172	1
ENSG00000067596	DHX8	77.6726	74.0564	74.7924	74.4672	-0.038063	1
ENSG00000067601	PMS2P4	1.78034	2.21416	2.67338	1.89627	-0.0880029	1
ENSG00000067606	PRKCZ	5.67225	4.94652	4.28984	4.56131	-0.0778672	1
ENSG00000067646	ZFY	29.0651	27.7947	34.3809	32.8517	-0.0633464	1
ENSG00000067704	IARS2	1287.85	1515.85	1209.11	979.81	-0.000748321	1
ENSG00000067715	SYT1	28.4441	29.7262	20.1436	20.1415	0.0351204	1
ENSG00000067798	NAV3	9.27434	7.91443	5.53327	10.5064	0.303413	1
ENSG00000067829	IDH3G	42.811	34.0603	34.1322	39.5655	-0.0662978	1
ENSG00000067836	ROGDI	2.89823	2.40259	3.17075	2.87004	-0.19948	1
ENSG00000067840	PDZD4	1.69754	1.31907	1.42995	1.64002	-0.0942998	1
ENSG00000067900	ROCK1	39.2503	39.7135	43.7688	59.8607	0.262616	1
ENSG00000067955	CBFB	145.326	149.856	194.286	171.638	-0.0785067	1
ENSG00000067992	PDK3	8.44627	9.65749	10.88	6.61133	-0.240699	1
ENSG00000068001	HYAL2	42.2728	37.8762	28.9098	29.5716	-0.080371	1
ENSG00000068024	HDAC4	55.8117	55.825	52.7836	56.7344	0.0511499	1
ENSG00000068028	RASSF1	15.8161	14.4627	13.1182	15.2214	0.0322134	1
ENSG00000068078	FGFR3	10.5578	10.9766	7.89579	8.14885	0.0464056	1
ENSG00000068079	IFI35	12.7936	11.2592	10.3205	13.7864	0.109509	1
ENSG00000068097	HEATR6	25.7943	26.3814	25.3038	29.7254	0.134158	1
ENSG00000068120	COASY	85.001	71.1827	67.5805	75.2359	-0.0609168	1
ENSG00000068137	PLEKHH3	23.2687	17.1008	11.7504	12.9664	-0.224557	1
ENSG00000068305	MEF2A	14.4912	14.8867	15.6672	18.2965	0.138723	1
ENSG00000068308	OTUD5	27.5332	22.8482	24.1226	26.8041	-0.0596548	1
ENSG00000068323	TFE3	59.4551	56.3903	55.7057	69.1884	0.124094	1
ENSG00000068354	TBC1D25	11.4273	10.5997	10.6935	12.0951	0.0343397	1
ENSG00000068366	ACSL4	211.902	227.022	219.03	185.22	-0.0638379	1
ENSG00000068383	INPP5A	18.3417	17.2893	22.6304	18.0402	-0.210078	1
ENSG00000068394	GPKOW	25.9185	21.5762	21.5114	24.1903	-0.0549054	1
ENSG00000068400	GRIPAP1	36.5591	32.8355	33.697	36.9517	-0.0110882	1
ENSG00000068438	FTSJ1	59.3723	53.8464	56.7005	61.6033	-0.00840816	1
ENSG00000068489	PRR11	117.503	119.423	115.08	80.361	-0.219084	1
ENSG00000068615	REEP1	2.64981	2.02572	2.23818	1.23002	-0.586945	1
ENSG00000068650	ATP11A	59.8278	63.5039	44.95	52.3781	0.143596	1
ENSG00000068654	POLR1A	114.729	112.357	116.883	136.634	0.104321	1
ENSG00000068697	LAPTM4A	159.403	192.584	142.746	115.211	0.0266942	1
ENSG00000068724	TTC7A	27.5746	22.1887	20.3301	25.4716	-0.0120185	1
ENSG00000068745	IP6K2	29.976	27.6534	27.915	30.8529	0.0138918	1
ENSG00000068784	SRBD1	30.5142	28.4071	44.2661	36.8492	-0.194262	1
ENSG00000068796	KIF2A	53.6587	53.8464	67.5805	57.7595	-0.117807	1
ENSG00000068878	PSME4	97.215	105.903	94.8116	83.4873	-0.0198402	1
ENSG00000068885	IFT80	6.08629	7.16067	9.51225	8.0976	-0.0210029	1
ENSG00000068903	SIRT2	13.9115	12.437	14.0508	11.6339	-0.215446	1
ENSG00000068912	ERLEC1	285.269	322.089	250.676	188.039	-0.0712406	1
ENSG00000069011	PITX1	27.616	21.4349	18.2784	27.8291	0.0970973	1
ENSG00000069020	MAST4	1.53192	2.4497	1.86515	2.20378	0.469616	1
ENSG00000069248	NUP133	144.87	145.333	180.111	148.371	-0.145435	1
ENSG00000069275	NUCKS1	760.993	786.92	1094.16	872.644	-0.160613	1
ENSG00000069329	VPS35	189.42	209.921	248.811	198.955	-0.0995097	1
ENSG00000069345	DNAJA2	135.596	141.941	178.37	176.558	0.0211627	1
ENSG00000069399	BCL3	5.0512	3.15635	2.11383	3.38254	-0.150468	1
ENSG00000069424	KCNAB2	24.0553	22.6598	21.2005	21.679	-0.0316782	1
ENSG00000069431	ABCC9	74.4017	81.1229	63.9745	67.1383	0.0988556	1
ENSG00000069482	GAL	93.4059	97.2815	77.8388	81.591	0.0621093	1
ENSG00000069509	FUNDC1	18.7971	22.2358	26.3607	19.8852	-0.0958258	1
ENSG00000069667	RORA	37.7184	29.4436	30.6506	31.6216	-0.165057	1
ENSG00000069702	TGFBR3	37.056	41.6921	37.0542	40.5392	0.150064	1
ENSG00000069849	ATP1B3	779.334	909.405	700.922	612.24	0.0397723	1
ENSG00000069869	NEDD4	150.749	152.824	134.85	147.243	0.0709665	1
ENSG00000069943	PIGB	45.9577	53.1868	45.8204	37.5667	-0.015671	1
ENSG00000069956	MAPK6	224.613	223.865	268.27	259.226	-0.0286908	1
ENSG00000069966	GNB5	94.8136	91.487	90.2731	90.3036	-0.0261924	1
ENSG00000069974	RAB27A	7.24558	7.58466	8.89053	6.56008	-0.182437	1
ENSG00000069998	CECR5	61.3597	51.7735	48.8668	56.2732	-0.0307868	1
ENSG00000070010	UFD1L	47.7794	46.0733	56.7005	54.9407	-0.0476051	1
ENSG00000070018	LRP6	107.524	112.875	84.802	80.0535	0.00399996	1
ENSG00000070047	PHRF1	46.9099	41.2681	37.4273	46.2281	0.0505005	1
ENSG00000070061	IKBKAP	117.42	130.023	152.507	125.564	-0.0779247	1
ENSG00000070081	NUCB2	101.272	122.391	95.6198	88.6123	0.0998614	1
ENSG00000070087	PFN2	151.453	161.775	190.369	161.952	-0.0779036	1
ENSG00000070159	PTPN3	29.6448	28.8311	28.4746	26.3941	-0.0740229	1
ENSG00000070214	SLC44A1	1345.32	1517.26	1354.53	1051.41	-0.0718371	1
ENSG00000070269	TMEM260	26.7879	30.1973	27.169	24.5491	0.0217902	1
ENSG00000070366	SMG6	17.555	16.5826	18.6515	17.6815	-0.0785851	1
ENSG00000070367	EXOC5	118.579	113.299	143.616	139.453	-0.0524448	1
ENSG00000070371	CLTCL1	6.2519	6.03004	6.46584	4.66381	-0.246679	1
ENSG00000070404	FSTL3	111.996	106.939	58.0682	88.0486	0.195961	1
ENSG00000070413	DGCR2	55.5632	50.1718	41.3441	50.0719	0.0463064	1
ENSG00000070423	RNF126	30.7213	25.2979	18.9623	29.1616	0.127144	1
ENSG00000070444	MNT	11.1789	9.32772	5.53327	9.12261	0.130882	1
ENSG00000070476	ZXDC	18.6315	15.4991	13.3047	15.2727	-0.0593081	1
ENSG00000070495	JMJD6	37.5114	36.2273	46.2556	48.5856	0.019073	1
ENSG00000070501	POLB	13.2905	13.3792	15.2942	13.6327	-0.0783509	1
ENSG00000070540	WIPI1	12.4624	11.7303	6.21715	10.0964	0.215471	1
ENSG00000070610	GBA2	19.6252	18.5612	15.232	17.169	0.0313209	1
ENSG00000070614	NDST1	87.8164	78.8145	64.6584	75.4922	0.0156668	1
ENSG00000070669	ASNS	120.98	112.404	68.5752	176.763	0.608341	1
ENSG00000070718	AP3M2	22.8546	20.3043	24.8686	24.0365	-0.105229	1
ENSG00000070756	PABPC1	362.031	401.563	412.011	403.599	0.0570257	1
ENSG00000070761	CFAP20	63.2229	64.4932	62.3581	65.2421	0.0468068	1
ENSG00000070770	CSNK2A2	147.561	155.415	173.583	168.666	0.0135519	1
ENSG00000070778	PTPN21	13.7045	14.0387	13.4291	13.5814	0.0252628	1
ENSG00000070785	EIF2B3	39.3745	40.7499	53.4054	43.0505	-0.144457	1
ENSG00000070814	TCOF1	168.222	148.678	161.46	188.756	0.0333143	1
ENSG00000070831	CDC42	157.457	168.37	214.243	162.823	-0.165818	1
ENSG00000070882	OSBPL3	29.3135	29.208	28.9098	29.6229	0.0147008	1
ENSG00000070950	RAD18	31.0525	30.48	36.9299	35.5167	-0.0410158	1
ENSG00000070961	ATP2B1	633.264	670.889	637.072	768.708	0.180441	1
ENSG00000071051	NCK2	11.3031	12.8609	12.4343	13.6327	0.160846	1
ENSG00000071054	MAP4K4	101.397	102.322	100.221	99.5287	0.00163812	1
ENSG00000071082	RPL31	728.864	746.5	788.211	744.108	-0.0253406	1
ENSG00000071127	WDR1	183.706	180.43	173.459	197.11	0.0798267	1
ENSG00000071189	SNX13	126.777	139.822	130.685	115.929	-0.00937628	1
ENSG00000071205	ARHGAP10	10.3094	11.9659	14.0508	16.964	0.252326	1
ENSG00000071243	ING3	21.0743	21.8589	24.3091	24.1903	0.0230159	1
ENSG00000071282	LMCD1	5.58945	4.66386	3.41944	4.30505	-0.0215721	1
ENSG00000071462	WBSCR22	207.969	210.722	169.044	169.332	0.0112531	1
ENSG00000071537	SEL1L	279.555	322.654	267.649	343.225	0.283082	1
ENSG00000071539	TRIP13	80.7364	82.6775	97.2363	86.3573	-0.0734066	1
ENSG00000071553	ATP6AP1	186.936	198.897	145.668	167.59	0.139441	1
ENSG00000071564	TCF3	44.4257	44.3773	42.3388	52.4806	0.157866	1
ENSG00000071575	TRIB2	3.7263	4.23987	4.66287	3.33129	-0.135472	1
ENSG00000071626	DAZAP1	94.3995	87.0116	85.3615	106.499	0.105638	1
ENSG00000071655	MBD3	37.1388	31.7519	31.7697	44.8443	0.150433	1
ENSG00000071794	HLTF	85.7877	83.9495	97.0498	81.8473	-0.140442	1
ENSG00000071859	FAM50A	34.2405	31.6577	28.7854	35.3117	0.0848839	1
ENSG00000071889	FAM3A	52.9548	41.8334	29.0341	36.1317	-0.0753894	1
ENSG00000071894	CPSF1	21.0743	17.2421	16.7241	20.7565	0.00322846	1
ENSG00000071967	CYBRD1	178.904	206.717	196.524	131.458	-0.150452	1
ENSG00000071991	CDH19	145.822	174.965	164.755	179.685	0.191815	1
ENSG00000071994	PDCD2	82.9722	93.8896	101.588	92.3024	0.0137181	1
ENSG00000072041	SLC6A15	212.151	246.384	190.68	195.111	0.132099	1
ENSG00000072042	RDH11	299.222	373.486	293.201	226.579	0.0185564	1
ENSG00000072062	PRKACA	5.29962	4.99363	7.02539	5.43257	-0.23175	1
ENSG00000072071	ADGRL1	19.3767	18.0901	10.134	10.8651	-0.031797	1
ENSG00000072110	ACTN1	160.521	188.674	146.538	209.923	0.376057	1
ENSG00000072121	ZFYVE26	28.3199	26.4285	21.387	28.9566	0.151763	1
ENSG00000072133	RPS6KA6	8.98452	9.56327	8.82836	10.8139	0.192611	1
ENSG00000072134	EPN2	33.3297	32.5999	26.5473	29.4691	0.0492068	1
ENSG00000072135	PTPN18	33.3711	27.5592	29.0341	30.4429	-0.107775	1
ENSG00000072210	ALDH3A2	197.659	205.021	213.808	174.303	-0.117083	1
ENSG00000072274	TFRC	1933.95	2376.45	2001.3	1988.88	0.14965	1
ENSG00000072310	SREBF1	170.582	147.595	118.996	129.254	-0.0656146	1
ENSG00000072364	AFF4	139.364	132.143	122.105	141.4	0.0646127	1
ENSG00000072401	UBE2D1	25.049	23.9317	31.7075	26.1891	-0.176393	1
ENSG00000072415	MPP5	63.8025	75.7053	79.4552	65.3446	-0.0208792	1
ENSG00000072422	RHOBTB1	24.3865	20.634	22.6304	23.0115	-0.109072	1
ENSG00000072501	SMC1A	383.684	407.357	379.06	316.678	-0.0750941	1
ENSG00000072506	HSD17B10	106.406	94.4078	95.9307	110.086	0.0146606	1
ENSG00000072518	MARK2	22.5234	21.4349	17.9676	19.2702	0.00414559	1
ENSG00000072571	HMMR	105.247	118.057	154.621	138.94	-0.0151628	1
ENSG00000072609	CHFR	21.9023	21.1994	20.2058	24.4978	0.116009	1
ENSG00000072682	P4HA2	53.1204	58.7458	39.2302	33.6204	-0.000624792	1
ENSG00000072736	NFATC3	36.8489	38.8184	47.6234	38.1305	-0.131907	1
ENSG00000072756	TRNT1	37.8012	38.7242	44.577	42.333	-0.0216967	1
ENSG00000072778	ACADVL	203.125	186.743	135.223	141.964	-0.0422001	1
ENSG00000072786	STK10	15.6505	15.1222	15.7294	20.3978	0.177907	1
ENSG00000072803	FBXW11	64.4235	66.6131	68.513	68.0608	0.0192013	1
ENSG00000072840	EVC	9.81258	8.52685	6.21715	8.35385	0.0630412	1
ENSG00000072849	DERL2	88.7273	101.05	107.681	84.871	-0.0781451	1
ENSG00000072864	NDE1	43.6805	38.9126	36.5569	34.5429	-0.128724	1
ENSG00000072958	AP1M1	37.4286	29.1138	33.5105	36.593	-0.112389	1
ENSG00000073008	PVR	162.963	175.484	133.047	147.346	0.124633	1
ENSG00000073050	XRCC1	13.2491	13.0023	11.1287	12.6077	0.0667444	1
ENSG00000073060	SCARB1	523.628	509.02	382.728	431.53	0.0532097	1
ENSG00000073111	MCM2	103.053	93.5598	112.531	122.13	0.000831775	1
ENSG00000073150	PANX2	5.67225	4.42831	3.66812	5.58632	0.0839687	1
ENSG00000073169		36.1451	31.5635	18.2163	23.114	0.00465568	1
ENSG00000073331	ALPK1	13.7873	14.6511	11.3774	11.0189	0.02608	1
ENSG00000073350	LLGL2	17.8448	11.9188	9.51225	12.4539	-0.174913	1
ENSG00000073417	PDE8A	60.0762	60.8657	63.6015	62.4745	-0.00350048	1
ENSG00000073464	CLCN4	24.8006	24.9681	24.6199	27.3678	0.0822275	1
ENSG00000073536	NLE1	46.9099	41.9276	46.9395	61.8083	0.143965	1
ENSG00000073578	SDHA	314.085	327.742	240.977	239.545	0.0312039	1
ENSG00000073584	SMARCE1	52.3752	59.0755	71.6838	63.0895	-0.020402	1
ENSG00000073614	KDM5A	94.1097	92.4763	88.9053	87.9973	-0.0204482	1
ENSG00000073670	ADAM11	5.79646	5.65316	4.84938	3.53629	-0.214152	1
ENSG00000073711	PPP2R3A	1.69754	3.06213	2.48686	2.10128	0.32883	1
ENSG00000073712	FERMT2	90.9631	98.4121	115.39	104.705	-0.02192	1
ENSG00000073756	PTGS2	5.83787	6.8309	4.72504	9.99387	0.661917	1
ENSG00000073792	IGF2BP2	8.44627	5.88871	4.35201	5.58632	-0.167561	1
ENSG00000073803	MAP3K13	22.482	21.7647	24.4334	21.8328	-0.104253	1
ENSG00000073849	ST6GAL1	29.3135	33.9661	19.3975	23.6265	0.239076	1
ENSG00000073910	FRY	20.9501	17.2421	16.1024	12.9152	-0.299471	1
ENSG00000073921	PICALM	72.6628	73.7738	81.0095	72.0071	-0.075305	1
ENSG00000073969	NSF	31.5079	33.5421	44.204	33.8767	-0.164587	1
ENSG00000074047	GLI2	6.2519	6.3127	5.96847	6.66258	0.0840404	1
ENSG00000074054	CLASP1	61.1113	61.9492	69.3213	62.4233	-0.0676407	1
ENSG00000074071	MRPS34	104.626	86.3049	94.9981	105.935	-0.0549914	1
ENSG00000074181	NOTCH3	245.77	204.739	134.042	158.621	-0.0643882	1
ENSG00000074201	CLNS1A	113.818	123.38	147.595	127.665	-0.0575687	1
ENSG00000074211	PPP2R2C	38.2567	39.6664	43.6444	41.4105	-0.0130893	1
ENSG00000074219	TEAD2	13.9115	15.1222	11.0044	10.6089	0.0431872	1
ENSG00000074266	EED	23.8069	22.5184	26.4851	25.5741	-0.0633122	1
ENSG00000074319	TSG101	38.8363	40.6086	42.0901	37.618	-0.0477403	1
ENSG00000074356	NCBP3	63.3471	60.9128	71.8081	74.5184	0.00348346	1
ENSG00000074370	ATP2A3	12.1726	9.46905	8.26882	6.76508	-0.336832	1
ENSG00000074410	CA12	221.011	251.236	217.538	196.29	0.0292945	1
ENSG00000074416	MGLL	1.57333	1.74306	1.18126	1.48627	0.207907	1
ENSG00000074527	NTN4	156.339	175.672	121.732	148.883	0.222503	1
ENSG00000074582	BCS1L	54.6938	53.8935	56.7005	57.2982	-0.0024053	1
ENSG00000074590	NUAK1	47.4068	46.9212	39.4168	39.9755	-0.00017408	1
ENSG00000074603	DPP8	72.373	72.6431	79.5174	78.5672	-0.00593099	1
ENSG00000074621	SLC24A1	7.4526	6.64247	6.90104	5.84257	-0.202733	1
ENSG00000074657	ZNF532	5.87927	6.21848	4.60069	8.3026	0.459522	1
ENSG00000074695	LMAN1	917.042	1034.81	908.015	784.288	-0.00469849	1
ENSG00000074696	HACD3	758.467	959.342	862.63	642.427	-0.0172235	1
ENSG00000074755	ZZEF1	74.8158	75.7524	70.1295	66.3696	-0.0286413	1
ENSG00000074800	ENO1	2477.45	2282.46	2573.65	2772.04	0.000972216	1
ENSG00000074842	MYDGF	152.613	150.798	114.147	115.775	-0.00160241	1
ENSG00000074855	ANO8	8.44627	7.16067	5.34675	4.51006	-0.247695	1
ENSG00000074935	TUBE1	21.6125	16.7239	15.7294	22.499	0.0662664	1
ENSG00000074964	ARHGEF10L	4.26454	4.05143	3.91681	3.33129	-0.149863	1
ENSG00000075089	ACTR6	38.5879	40.373	50.1724	39.3092	-0.153052	1
ENSG00000075131	TIPIN	36.6833	39.1953	55.6435	52.2244	-0.0125078	1
ENSG00000075142	SRI	82.0614	85.1272	96.9254	83.6923	-0.0834302	1
ENSG00000075151	EIF4G3	69.4747	70.2877	61.1146	61.4495	0.011879	1
ENSG00000075188	NUP37	52.7064	57.2383	71.8703	59.7582	-0.0886054	1
ENSG00000075213	SEMA3A	264.857	278.418	203.363	214.894	0.0750869	1
ENSG00000075218	GTSE1	28.1128	26.3814	23.8117	26.7016	0.0290687	1
ENSG00000075223	SEMA3C	48.4005	49.4181	32.7022	41.8718	0.168542	1
ENSG00000075234	TTC38	14.9466	14.9338	15.6672	15.0677	-0.0280108	1
ENSG00000075239	ACAT1	159.486	183.492	154.558	139.658	0.0412933	1
ENSG00000075240	GRAMD4	16.3129	14.3685	8.64185	6.40633	-0.267104	1
ENSG00000075275	CELSR1	27.0364	27.3707	19.7084	29.0591	0.267283	1
ENSG00000075292	ZNF638	159.527	170.49	205.85	262.608	0.245567	1
ENSG00000075303	SLC25A40	29.769	31.0453	34.0078	25.1641	-0.179959	1
ENSG00000075336	TIMM21	77.7554	82.2064	93.9412	66.6771	-0.204551	1
ENSG00000075340	ADD2	60.7801	63.3154	64.2232	58.9382	-0.031516	1
ENSG00000075391	RASAL2	22.8132	20.0687	22.3196	27.7778	0.082988	1
ENSG00000075399	VPS9D1	4.30594	3.62745	3.29509	4.71506	0.119727	1
ENSG00000075407	ZNF37A	17.969	21.7176	25.739	40.693	0.515879	1
ENSG00000075413	MARK3	89.6382	84.1379	92.0761	92.7124	-0.0391001	1
ENSG00000075415	SLC25A3	599.603	593.111	630.544	606.09	-0.036719	1
ENSG00000075420	FNDC3B	116.882	114.901	99.5367	104.654	0.0201841	1
ENSG00000075426	FOSL2	48.5247	43.7649	33.8213	42.9993	0.0728377	1
ENSG00000075539	FRYL	80.6122	83.8081	81.7556	74.2622	-0.0384787	1
ENSG00000075568	TMEM131	89.4311	100.909	81.7556	82.3085	0.0977	1
ENSG00000075618	FSCN1	113.9	82.2535	75.4141	92.1486	-0.119862	1
ENSG00000075624	ACTB	3647.09	3329.01	3172.93	3487.35	-0.000795327	1
ENSG00000075643	MOCOS	42.7696	41.645	41.5928	55.5044	0.202817	1
ENSG00000075651	PLD1	30.597	31.5635	33.1996	26.3941	-0.13687	1
ENSG00000075702	WDR62	56.4741	48.3345	46.753	55.4019	0.00520964	1
ENSG00000075711	DLG1	59.4966	65.4825	67.5805	57.9132	-0.041234	1
ENSG00000075785	RAB7A	48.6903	50.69	48.183	51.6094	0.0784593	1
ENSG00000075790	BCAP29	121.974	142.978	142.435	106.14	-0.0853072	1
ENSG00000075856	SART3	106.572	100.532	109.795	114.904	-0.00620726	1
ENSG00000075914	EXOSC7	34.2405	29.632	34.6296	31.1604	-0.179952	1
ENSG00000075945	KIFAP3	26.7879	24.0731	26.9203	20.5515	-0.266566	1
ENSG00000075975	MKRN2	41.4033	40.0903	41.4684	44.0755	0.0221408	1
ENSG00000076003	MCM6	159.403	174.117	220.771	177.173	-0.113422	1
ENSG00000076043	REXO2	27.9472	31.9875	33.1374	32.5954	0.0824517	1
ENSG00000076053	RBM7	12.8764	13.8502	15.7294	13.1714	-0.0772443	1
ENSG00000076067	RBMS2	45.4194	48.8527	38.049	47.5606	0.206144	1
ENSG00000076108	BAZ2A	50.5948	45.508	45.2609	45.3056	-0.0791603	1
ENSG00000076201	PTPN23	8.19785	7.49044	4.72504	7.8926	0.237926	1
ENSG00000076242	MLH1	48.8145	48.6643	59.436	51.9169	-0.104621	1
ENSG00000076248	UNG	70.22	72.2663	88.8431	86.2036	-0.00449715	1
ENSG00000076321	KLHL20	27.1192	25.1095	26.9825	30.7504	0.0454444	1
ENSG00000076351	SLC46A1	52.6236	57.8036	51.2294	54.3257	0.110448	1
ENSG00000076356	PLXNA2	59.9934	58.3689	42.1523	56.1707	0.162659	1
ENSG00000076382	SPAG5	148.472	150.139	168.858	136.839	-0.144587	1
ENSG00000076513	ANKRD13A	19.708	18.9852	22.5683	19.629	-0.128297	1
ENSG00000076554	TPD52	81.5645	81.0758	100.78	87.1261	-0.115473	1
ENSG00000076555	ACACB	6.37611	6.07715	5.40892	6.66258	0.105807	1
ENSG00000076604	TRAF4	48.7317	45.1311	39.9763	59.9632	0.242411	1
ENSG00000076641	PAG1	450.634	492.108	374.211	275.831	-0.103161	1
ENSG00000076650	GPATCH1	9.85399	11.0237	11.3774	12.6589	0.160969	1
ENSG00000076662	ICAM3	5.54804	4.80519	4.97372	5.12506	-0.0888284	1
ENSG00000076685	NT5C2	123.051	126.772	143.803	150.113	0.0536184	1
ENSG00000076706	MCAM	560.849	573.655	366.626	398.115	0.0671329	1
ENSG00000076864	RAP1GAP	1.86315	1.41329	1.98949	1.02501	-0.646943	1
ENSG00000076924	XAB2	37.3872	33.3065	28.9098	37.6692	0.0950384	1
ENSG00000076928	ARHGEF1	43.4321	31.6106	28.2259	42.0768	0.0366758	1
ENSG00000076944	STXBP2	2.98104	3.29768	1.92732	3.43379	0.429582	1
ENSG00000076984	MAP2K7	12.4624	10.3641	10.134	10.7114	-0.105788	1
ENSG00000077044	DGKD	275.456	244.735	160.216	202.799	0.0383237	1
ENSG00000077092	RARB	4.09893	3.06213	6.03064	3.22879	-0.67269	1
ENSG00000077097	TOP2B	137.086	136.477	135.223	149.754	0.0718126	1
ENSG00000077147	TM9SF3	830.219	941.252	903.29	786.133	-0.00504481	1
ENSG00000077150	NFKB2	45.171	38.9597	18.0297	65.7033	0.72469	1
ENSG00000077152	UBE2T	99.9062	107.834	131.431	97.735	-0.169302	1
ENSG00000077157	PPP1R12B	22.0266	20.634	20.2679	19.6802	-0.0705734	1
ENSG00000077232	DNAJC10	523.959	586.751	511.112	432.607	-0.0220432	1
ENSG00000077235	GTF3C1	287.96	304.894	261.369	245.593	0.00295262	1
ENSG00000077238	IL4R	15.8989	16.9595	8.45533	11.0701	0.197857	1
ENSG00000077254	USP33	85.001	95.0673	94.6251	77.4397	-0.0575833	1
ENSG00000077264	PAK3	195.506	181.843	184.09	158.416	-0.157899	1
ENSG00000077312	SNRPA	75.9751	69.2984	75.8493	83.436	0.00837272	1
ENSG00000077348	EXOSC5	13.1248	13.3792	12.3721	14.6577	0.135121	1
ENSG00000077380	DYNC1I2	69.806	75.2813	82.3773	73.0321	-0.0361167	1
ENSG00000077454	LRCH4	1.86315	1.88439	1.05692	2.40878	0.511692	1
ENSG00000077458	FAM76B	14.4084	14.4156	18.7136	18.5527	-0.00319049	1
ENSG00000077463	SIRT6	8.15645	5.93582	6.7767	7.63634	-0.145168	1
ENSG00000077514	POLD3	25.6701	24.3557	38.9816	31.9804	-0.195839	1
ENSG00000077549	CAPZB	36.4763	36.4629	40.5359	43.6655	0.0580355	1
ENSG00000077585	GPR137B	5.75506	5.41761	3.97898	4.10005	-0.0389198	1
ENSG00000077684	JADE1	85.001	91.2986	90.5218	89.2786	0.0413661	1
ENSG00000077713	SLC25A43	65.0032	60.112	65.7153	49.6106	-0.252155	1
ENSG00000077721	UBE2A	78.7491	82.4891	103.64	86.5623	-0.108357	1
ENSG00000077782	FGFR1	62.2292	65.6709	49.7994	48.7906	0.029978	1
ENSG00000077942	FBLN1	8.90171	8.66818	4.28984	6.81633	0.219104	1
ENSG00000078018	MAP2	38.4637	40.7499	39.9141	44.2805	0.117801	1
ENSG00000078043	PIAS2	22.9788	23.6962	26.7959	29.1104	0.0870368	1
ENSG00000078061	ARAF	61.3183	52.8571	51.4159	56.9395	-0.0397402	1
ENSG00000078070	MCCC1	14.3669	17.0537	13.056	9.07136	-0.0694925	1
ENSG00000078114	NEBL	17.2652	15.876	19.9571	16.964	-0.177976	1
ENSG00000078124	ACER3	96.3455	110.095	93.9412	84.051	0.029092	1
ENSG00000078140	UBE2K	108.518	120.459	140.197	114.391	-0.0818143	1
ENSG00000078142	PIK3C3	31.3837	32.4586	31.7697	34.8504	0.0919033	1
ENSG00000078177	N4BP2	21.7367	22.0002	30.2154	40.7443	0.273893	1
ENSG00000078237	TIGAR	18.3831	18.9852	22.3196	22.294	0.0230868	1
ENSG00000078246	TULP3	12.2554	12.437	14.1751	14.3502	0.022132	1
ENSG00000078269	SYNJ2	14.3669	17.1008	17.1593	18.194	0.16624	1
ENSG00000078304	PPP2R5C	230.492	235.36	248.313	197.981	-0.143721	1
ENSG00000078319	PMS2P1	7.28698	8.99795	6.7767	7.48259	0.22724	1
ENSG00000078369	GNB1	174.846	161.728	192.172	179.018	-0.10696	1
ENSG00000078399	HOXA9	3.60209	4.42831	3.97898	4.81756	0.290151	1
ENSG00000078401	EDN1	19.6666	21.5762	21.387	22.3453	0.0986815	1
ENSG00000078403	MLLT10	25.7529	25.2979	27.1068	27.1116	-0.0116944	1
ENSG00000078618	NRDC	252.146	258.35	277.347	259.892	-0.0308099	1
ENSG00000078668	VDAC3	154.931	161.445	203.798	164.72	-0.136719	1
ENSG00000078674	PCM1	75.6024	72.3134	86.978	104.039	0.11761	1
ENSG00000078687	TNRC6C	12.4624	10.5055	8.5175	10.7626	0.0124083	1
ENSG00000078699	CBFA2T2	8.36347	7.53755	7.70927	7.8926	-0.0619604	1
ENSG00000078747	ITCH	55.646	55.5423	62.6689	54.1207	-0.108434	1
ENSG00000078808	SDF4	214.8	196.071	139.451	168.666	0.041424	1
ENSG00000078902	TOLLIP	12.2968	11.5419	8.5175	11.5826	0.143948	1
ENSG00000078967	UBE2D4	11.0133	8.71529	12.4965	9.68637	-0.350789	1
ENSG00000079134	THOC1	30.8041	33.1652	42.6497	41.103	0.0180102	1
ENSG00000079150	FKBP7	23.8897	30.9511	25.6768	16.964	-0.0471997	1
ENSG00000079156	OSBPL6	17.1824	20.2101	18.7136	19.3727	0.143094	1
ENSG00000079215	SLC1A3	44.6328	58.5102	51.9132	52.1731	0.198728	1
ENSG00000079246	XRCC5	722.115	755.168	966.022	783.981	-0.133172	1
ENSG00000079257	LXN	46.8685	48.8056	34.6296	22.5503	-0.192126	1
ENSG00000079277	MKNK1	15.195	14.1329	14.9212	13.4277	-0.128046	1
ENSG00000079313	REXO1	16.3543	12.7667	9.01487	13.9402	0.0664303	1
ENSG00000079332	SAR1A	387.908	447.448	427.492	298.279	-0.128712	1
ENSG00000079335	CDC14A	4.71998	3.81588	5.53327	5.89382	-0.0761206	1
ENSG00000079337	RAPGEF3	5.75506	3.62745	3.17075	4.76631	-0.105644	1
ENSG00000079387	SENP1	36.6419	39.6192	48.9912	42.538	-0.0571724	1
ENSG00000079432	CIC	16.0231	13.6147	8.33099	14.6064	0.203306	1
ENSG00000079459	FDFT1	156.794	169.689	130.125	82.2573	-0.187554	1
ENSG00000079462	PAFAH1B3	13.8701	12.2485	10.7557	11.9926	-0.0289171	1
ENSG00000079482	OPHN1	13.4147	11.7774	9.76093	9.12261	-0.154279	1
ENSG00000079616	KIF22	111.333	97.8468	108.676	109.266	-0.0873621	1
ENSG00000079691	CARMIL1	8.90171	9.79882	11.9369	8.71261	-0.163057	1
ENSG00000079739	PGM1	19.6252	18.6554	18.6515	18.0402	-0.0617243	1
ENSG00000079785	DDX1	197.411	214.066	263.297	238.982	-0.0237863	1
ENSG00000079805	DNM2	47.1998	41.1268	40.0385	46.6381	0.00666362	1
ENSG00000079819	EPB41L2	28.6511	31.2808	26.9203	24.6516	0.0091233	1
ENSG00000079950	STX7	16.2301	17.8075	19.5219	15.5289	-0.0967016	1
ENSG00000079974	RABL2B	3.93331	2.9208	4.35201	3.48504	-0.368176	1
ENSG00000079999	KEAP1	74.8986	67.414	72.6164	94.4037	0.133014	1
ENSG00000080031	PTPRH	12.3382	11.7303	6.52801	9.12261	0.136378	1
ENSG00000080189	SLC35C2	67.032	59.264	52.8458	63.397	0.0312445	1
ENSG00000080200	CRYBG3	38.8363	39.2424	45.1987	59.502	0.233291	1
ENSG00000080298	RFX3	5.67225	6.54825	5.65761	7.02134	0.259435	1
ENSG00000080345	RIF1	171.7	195.27	256.022	325.237	0.283532	1
ENSG00000080371	RAB21	88.5617	88.6133	110.044	106.704	-0.023378	1
ENSG00000080503	SMARCA2	46.3717	49.0412	54.8975	42.8455	-0.138488	1
ENSG00000080546	SESN1	11.0547	10.1757	10.2583	10.3014	-0.0597903	1
ENSG00000080603	SRCAP	2.81542	2.4497	1.98949	2.51128	0.0266156	1
ENSG00000080608	PUM3	71.2965	72.3605	90.3353	97.0174	0.0683133	1
ENSG00000080802	CNOT4	12.5038	11.4005	12.0613	11.3264	-0.113123	1
ENSG00000080815	PSEN1	139.446	160.22	137.399	132.022	0.0781513	1
ENSG00000080819	CPOX	46.5787	49.2296	50.732	37.1567	-0.170505	1
ENSG00000080822	CLDND1	72.5386	81.3584	80.5743	56.8882	-0.146488	1
ENSG00000080823	MOK	36.6419	35.0025	25.0551	35.4142	0.186791	1
ENSG00000080824	HSP90AA1	3188.47	3366.69	3906.74	2864.3	-0.187355	1
ENSG00000080839	RBL1	78.2937	90.0737	106.127	94.8137	0.00477361	1
ENSG00000080845	DLGAP4	9.72978	7.53755	5.96847	8.96886	0.0608231	1
ENSG00000080986	NDC80	37.47	40.4672	44.95	39.258	-0.0457916	1
ENSG00000081014	AP4E1	41.2377	43.9533	54.2758	50.6869	-0.0112406	1
ENSG00000081019	RSBN1	13.042	10.9294	15.2942	12.3002	-0.283552	1
ENSG00000081026	MAGI3	16.1887	14.2271	14.2995	13.5302	-0.138038	1
ENSG00000081041	CXCL2	65.3758	60.4888	44.4527	105.013	0.590009	1
ENSG00000081052	COL4A4	12.1726	12.5312	7.83362	8.71261	0.0812378	1
ENSG00000081087	OSTM1	144.084	170.066	151.512	127.409	0.00943322	1
ENSG00000081138	CDH7	74.0705	88.7547	69.4456	76.4147	0.202472	1
ENSG00000081154	PCNP	98.5399	110.142	131.12	111.778	-0.0484246	1
ENSG00000081177	EXD2	56.0187	63.127	57.3843	51.3019	0.0135394	1
ENSG00000081181	ARG2	2.19438	1.88439	1.92732	1.64002	-0.231284	1
ENSG00000081189	MEF2C	40.5338	42.2574	58.0061	46.1768	-0.153741	1
ENSG00000081307	UBA5	35.9795	34.7198	46.5665	38.7967	-0.164774	1
ENSG00000081320	STK17B	57.6334	59.0755	72.3055	53.0957	-0.210372	1
ENSG00000081377	CDC14B	38.2567	37.4522	46.3178	34.3379	-0.234268	1
ENSG00000081386	ZNF510	22.1922	23.8846	25.366	20.039	-0.112223	1
ENSG00000081479	LRP2	1.82175	1.97861	1.80297	2.40878	0.271361	1
ENSG00000081692	JMJD4	34.1991	27.1823	33.5726	40.3342	-0.0063457	1
ENSG00000081721	DUSP12	44.1773	41.9747	51.3537	54.0182	0.00776306	1
ENSG00000081760	AACS	33.2883	29.0667	29.4693	31.4166	-0.0551529	1
ENSG00000081791	KIAA0141	61.5253	56.9085	58.3169	65.8058	0.0334758	1
ENSG00000081803	CADPS2	39.2503	38.3473	46.9395	35.9267	-0.212566	1
ENSG00000081870	HSPB11	23.4757	25.3921	30.5262	21.7815	-0.19108	1
ENSG00000081913	PHLPP1	5.0098	5.93582	6.40367	4.2538	-0.152852	1
ENSG00000081923	ATP8B1	2.35999	2.30837	1.55429	1.89627	0.0867048	1
ENSG00000082014	SMARCD3	28.9823	26.617	31.894	34.5942	0.00842732	1
ENSG00000082068	WDR70	22.482	22.5655	28.9098	26.4453	-0.0656014	1
ENSG00000082146	STRADB	36.3521	38.3944	47.9343	37.9767	-0.139599	1
ENSG00000082153	BZW1	425.046	438.073	493.766	429.634	-0.0824031	1
ENSG00000082212	ME2	219.438	236.773	209.705	159.902	-0.113439	1
ENSG00000082213	C5orf22	39.6644	37.5935	43.5201	41.0005	-0.0809882	1
ENSG00000082258	CCNT2	96.0971	95.774	84.2424	90.6624	0.0473347	1
ENSG00000082269	FAM135A	22.3578	23.602	28.1637	29.7766	0.081913	1
ENSG00000082293	COL19A1	8.94311	7.91443	8.57967	8.35385	-0.10889	1
ENSG00000082397	EPB41L3	582.006	581.852	561.658	538.439	-0.0298067	1
ENSG00000082438	COBLL1	19.708	17.6661	16.5998	17.8352	-0.0358214	1
ENSG00000082458	DLG3	28.7753	25.3921	22.5683	17.7327	-0.253103	1
ENSG00000082482	KCNK2	40.037	42.5872	48.2451	30.7504	-0.265466	1
ENSG00000082512	TRAF5	32.2946	31.4693	30.0289	35.7729	0.108141	1
ENSG00000082515	MRPL22	38.1738	36.1802	46.5665	42.4355	-0.106626	1
ENSG00000082516	GEMIN5	138.577	151.835	200.255	179.428	-0.0320525	1
ENSG00000082641	NFE2L1	422.521	419.794	317.759	441.524	0.218165	1
ENSG00000082701	GSK3B	45.9577	43.9533	47.6856	44.4343	-0.0829175	1
ENSG00000082781	ITGB5	237.117	234.936	176.505	183.58	0.0165844	1
ENSG00000082805	ERC1	50.305	53.7993	49.2399	49.4056	0.0520324	1
ENSG00000082898	XPO1	573.56	648.748	791.319	668.206	-0.0514202	1
ENSG00000082996	RNF13	81.5231	95.0202	88.9675	72.6734	-0.0231645	1
ENSG00000083093	PALB2	36.5177	38.6299	40.2872	39.3605	0.0233362	1
ENSG00000083097	DOPEY1	9.52276	9.98725	12.9317	13.3764	0.0623213	1
ENSG00000083099	LYRM2	49.1043	51.7735	64.8449	54.5307	-0.0981928	1
ENSG00000083123	BCKDHB	16.6441	18.2786	21.8222	15.9389	-0.16369	1
ENSG00000083168	KAT6A	49.684	50.5016	46.4421	47.5606	0.0281725	1
ENSG00000083223	ZCCHC6	28.9409	30.3386	27.1068	30.0841	0.107346	1
ENSG00000083290	ULK2	19.2111	18.1843	15.7294	16.8615	0.00114621	1
ENSG00000083312	TNPO1	902.841	928.485	989.025	1082.52	0.0881332	1
ENSG00000083444	PLOD1	203.414	202.572	158.351	169.127	0.0386284	1
ENSG00000083454	P2RX5	28.8167	31.1395	25.9877	23.8315	0.00369714	1
ENSG00000083457	ITGAE	26.9121	28.5014	38.9194	25.2666	-0.288175	1
ENSG00000083520	DIS3	63.3885	65.2469	78.3362	87.8436	0.112057	1
ENSG00000083535	PIBF1	9.06732	8.52685	14.1129	14.9139	0.020576	1
ENSG00000083544	TDRD3	19.7494	21.5762	24.8064	20.2952	-0.0856033	1
ENSG00000083635	NUFIP1	13.5389	12.3427	17.5324	17.3227	-0.0643869	1
ENSG00000083642	PDS5B	19.4182	22.0944	28.4124	24.2415	-0.0411601	1
ENSG00000083720	OXCT1	175.881	200.734	179.427	141.759	-0.0528034	1
ENSG00000083750	RRAGB	11.8413	10.741	9.76093	10.9164	-0.0011347	1
ENSG00000083799	CYLD	17.9276	19.6447	18.6515	21.8328	0.181699	1
ENSG00000083807	SLC27A5	11.0961	10.7881	8.0823	11.3776	0.1998	1
ENSG00000083812	ZNF324	7.12137	6.07715	7.08756	6.61133	-0.163962	1
ENSG00000083817	ZNF416	6.79014	5.55894	7.52276	7.02134	-0.184304	1
ENSG00000083828	ZNF586	12.5038	12.9081	16.3511	13.1714	-0.140107	1
ENSG00000083838	ZNF446	2.56701	1.4604	2.30035	2.10128	-0.461459	1
ENSG00000083844	ZNF264	28.4855	31.1866	29.8423	25.0616	-0.0511732	1
ENSG00000083845	RPS5	435.273	409.996	385.837	471.455	0.10214	1
ENSG00000083857	FAT1	660.797	715.408	592.495	713.563	0.189168	1
ENSG00000083896	YTHDC1	53.3689	53.1868	61.3011	61.552	0.00169916	1
ENSG00000083937	CHMP2B	30.8041	28.4543	41.9036	35.4654	-0.183459	1
ENSG00000084070	SMAP2	14.1185	14.5098	15.1699	13.3252	-0.071255	1
ENSG00000084072	PPIE	33.5367	33.5421	38.2977	37.5667	-0.0133061	1
ENSG00000084073	ZMPSTE24	452.538	548.31	542.882	455.977	0.0129752	1
ENSG00000084090	STARD7	375.155	381.212	461.375	433.939	-0.0371775	1
ENSG00000084092	NOA1	47.4896	49.2767	39.4168	39.668	0.0320802	1
ENSG00000084093	REST	62.6018	60.5831	57.26	62.0645	0.0323407	1
ENSG00000084112	SSH1	67.1148	59.8764	54.4623	52.3269	-0.116913	1
ENSG00000084207	GSTP1	295.495	259.81	260.064	323.699	0.0705579	1
ENSG00000084234	APLP2	833.987	889.384	649.444	647.962	0.0514247	1
ENSG00000084444	FAM234B	15.195	16.9595	12.4343	11.8901	0.0601613	1
ENSG00000084463	WBP11	57.6748	56.249	66.9588	61.5008	-0.0809502	1
ENSG00000084623	EIF3I	189.337	176.614	197.022	218.533	0.0324425	1
ENSG00000084636	COL16A1	1.78034	1.22485	1.67863	2.05003	-0.0891836	1
ENSG00000084652	TXLNA	122.264	121.213	119.307	136.839	0.0950173	1
ENSG00000084676	NCOA1	18.9627	20.2572	24.8686	23.4215	-0.00143918	1
ENSG00000084693	AGBL5	26.3325	25.0152	30.3397	28.7516	-0.0742172	1
ENSG00000084710	EFR3B	36.2279	32.5057	34.3187	29.8791	-0.17784	1
ENSG00000084731	KIF3C	14.781	11.1179	13.6777	11.2751	-0.347704	1
ENSG00000084733	RAB10	405.09	497.29	513.102	385.917	-0.0558185	1
ENSG00000084754	HADHA	442.601	472.463	380.241	335.999	-0.0255004	1
ENSG00000084764	MAPRE3	2.81542	2.16705	2.48686	1.74252	-0.442935	1
ENSG00000084774	CAD	114.397	103.736	110.355	124.539	0.0221395	1
ENSG00000085063	CD59	206.561	245.913	194.97	142.938	-0.0462294	1
ENSG00000085224	ATRX	79.867	95.1616	95.682	118.594	0.284719	1
ENSG00000085231	AK6	31.7149	37.4522	45.6339	32.9029	-0.1334	1
ENSG00000085274	MYNN	22.689	21.906	24.9308	24.0878	-0.0487805	1
ENSG00000085365	SCAMP1	155.842	176.897	156.175	100.144	-0.17134	1
ENSG00000085377	PREP	31.0111	33.4479	37.1164	34.1842	-0.00834255	1
ENSG00000085382	HACE1	7.494	6.45403	7.52276	6.76508	-0.184018	1
ENSG00000085415	SEH1L	69.6404	69.2041	90.7083	88.6123	-0.0220332	1
ENSG00000085433	WDR47	11.9242	12.1543	13.056	12.1977	-0.0342474	1
ENSG00000085449	WDFY1	46.2889	45.6022	45.6961	45.3568	-0.0163197	1
ENSG00000085491	SLC25A24	64.7962	69.9579	86.8537	65.1396	-0.165072	1
ENSG00000085511	MAP3K4	28.7339	28.7369	34.3187	32.6979	-0.035564	1
ENSG00000085563	ABCB1	9.9782	12.7667	10.3205	10.7626	0.214862	1
ENSG00000085644	ZNF213	4.88559	3.86299	3.29509	5.22756	0.134845	1
ENSG00000085662	AKR1B1	143.38	133.933	146.849	171.792	0.074974	1
ENSG00000085719	CPNE3	117.668	132.991	148.403	118.901	-0.078194	1
ENSG00000085721	RRN3	107.276	116.078	129.13	124.642	0.0267678	1
ENSG00000085733	CTTN	161.846	141.423	139.264	160.261	0.00220475	1
ENSG00000085760	MTIF2	257.322	284.872	261.68	234.882	0.00218609	1
ENSG00000085788	DDHD2	44.0117	42.6814	43.3336	42.9993	-0.0279668	1
ENSG00000085832	EPS15	46.2889	46.6386	48.183	44.8443	-0.0458642	1
ENSG00000085840	ORC1	57.5092	54.2233	78.0253	74.5697	-0.0727782	1
ENSG00000085871	MGST2	48.3591	56.0605	49.302	36.7467	-0.0728329	1
ENSG00000085872	CHERP	17.4722	15.5462	15.0455	15.5289	-0.0683701	1
ENSG00000085978	ATG16L1	82.4754	73.3969	70.5647	67.5483	-0.11962	1
ENSG00000085982	USP40	33.2883	34.0603	42.3388	43.6655	0.0411643	1
ENSG00000085998	POMGNT1	110.878	113.911	82.5016	88.0998	0.0621363	1
ENSG00000085999	RAD54L	11.2617	10.5055	11.1909	11.8389	-0.00780707	1
ENSG00000086015	MAST2	29.2721	24.921	23.563	25.9841	-0.0570375	1
ENSG00000086061	DNAJA1	194.182	216.045	334.607	296.639	-0.0443463	1
ENSG00000086062	B4GALT1	115.184	123.38	72.6164	62.0645	-0.0186371	1
ENSG00000086065	CHMP5	51.2987	52.1033	63.042	55.2994	-0.0886948	1
ENSG00000086102	NFX1	65.7485	60.2062	62.4824	68.8808	0.0089914	1
ENSG00000086189	DIMT1	61.5667	64.5874	82.9368	78.516	-0.0127461	1
ENSG00000086200	IPO11	78.2108	87.4827	93.4438	86.5623	0.0208487	1
ENSG00000086232	EIF2AK1	84.9596	84.6561	92.9465	74.1084	-0.163545	1
ENSG00000086289	EPDR1	390.475	437.743	431.098	315.396	-0.125318	1
ENSG00000086300	SNX10	14.2427	15.1222	21.5114	17.2715	-0.136763	1
ENSG00000086475	SEPHS1	73.1182	71.8894	90.3353	89.4836	-0.0176699	1
ENSG00000086504	MRPL28	59.4966	47.1568	47.3125	64.2683	0.0591045	1
ENSG00000086544	ITPKC	8.03224	7.7731	9.63659	10.3526	0.0402799	1
ENSG00000086589	RBM22	49.1043	51.2082	61.9229	64.0633	0.0553853	1
ENSG00000086598	TMED2	1055.33	1268.05	1175.85	834.053	-0.0859175	1
ENSG00000086619	ERO1B	21.9023	25.4392	15.4807	21.269	0.317847	1
ENSG00000086666	ZFAND6	39.2503	37.9233	46.753	42.743	-0.0908548	1
ENSG00000086712	TXLNG	84.0487	82.3006	103.391	106.55	0.0114222	1
ENSG00000086717	PPEF1	2.93963	4.28698	4.22767	2.61378	-0.0382714	1
ENSG00000086730	LAT2	24.842	25.3921	16.9728	13.0689	-0.122026	1
ENSG00000086758	HUWE1	210.37	204.032	173.583	184.092	0.0152089	1
ENSG00000086827	ZW10	33.7437	37.0753	44.8879	39.0017	-0.0452012	1
ENSG00000086848	ALG9	11.2203	13.2378	13.1804	13.1202	0.115746	1
ENSG00000087008	ACOX3	7.32839	6.50114	5.78195	6.50883	-0.0195873	1
ENSG00000087053	MTMR2	76.5961	80.322	103.391	84.7685	-0.123387	1
ENSG00000087074	PPP1R15A	35.6068	30.7626	13.4912	65.7033	0.970922	1
ENSG00000087077	TRIP6	84.4627	73.9151	79.7039	102.501	0.103266	1
ENSG00000087086	FTL	3888.35	3421.44	3708.41	3954.5	-0.0425675	1
ENSG00000087087	SRRT	114.936	97.1402	120.675	136.327	-0.013238	1
ENSG00000087088	BAX	37.1802	35.3323	30.4019	35.7729	0.0706121	1
ENSG00000087095	NLK	18.0932	17.2421	16.2889	14.4014	-0.121056	1
ENSG00000087111	PIGS	89.0585	90.4035	73.9841	71.9046	-0.00721902	1
ENSG00000087152	ATXN7L3	48.0692	45.6022	41.1576	47.9193	0.066078	1
ENSG00000087157	PGS1	37.3872	34.1545	28.2259	29.0591	-0.0563908	1
ENSG00000087191	PSMC5	86.4087	84.8917	104.51	99.17	-0.0520693	1
ENSG00000087206	UIMC1	41.8173	43.1996	44.7635	44.9981	0.0274031	1
ENSG00000087253	LPCAT2	4.84419	5.60605	4.22767	4.40755	0.138264	1
ENSG00000087263	OGFOD1	90.9217	94.8789	115.39	112.598	0.00891797	1
ENSG00000087266	SH3BP2	12.835	11.7303	7.08756	8.76386	0.0324846	1
ENSG00000087269	NOP14	120.359	123.71	135.72	141.4	0.0503321	1
ENSG00000087274	ADD1	88.6445	79.5683	94.6873	101.579	-0.0172161	1
ENSG00000087299	L2HGDH	28.7339	25.9574	24.9308	23.7803	-0.111552	1
ENSG00000087301	TXNDC16	14.3255	15.7817	14.9212	11.6851	-0.088504	1
ENSG00000087302	C14orf166	140.937	157.959	197.395	169.793	-0.045157	1
ENSG00000087303	NID2	260.261	270.08	230.221	265.581	0.126877	1
ENSG00000087338	GMCL1	41.4033	46.6386	48.3073	36.0804	-0.115142	1
ENSG00000087365	SF3B2	158.864	144.297	167.739	171.228	-0.0497292	1
ENSG00000087448	KLHL42	39.1261	39.2424	43.3957	42.333	-0.0155944	1
ENSG00000087460	GNAS	565.735	560.841	564.829	533.007	-0.0476218	1
ENSG00000087470	DNM1L	92.2466	91.5341	107.992	113.418	0.0340507	1
ENSG00000087494	PTHLH	4.59577	5.08785	4.47635	3.7413	-0.037762	1
ENSG00000087502	ERGIC2	106.324	119.235	121.421	87.9461	-0.135853	1
ENSG00000087510	TFAP2C	11.9242	11.6832	9.57442	15.5289	0.33338	1
ENSG00000087586	AURKA	200.475	199.51	224.004	186.194	-0.137917	1
ENSG00000087842	PIR	88.9343	87.5298	93.3817	78.0547	-0.138442	1
ENSG00000087884	AAMDC	2.35999	2.30837	2.61121	2.35753	-0.0846223	1
ENSG00000087903	RFX2	3.60209	3.3919	3.48161	3.89505	0.0373531	1
ENSG00000087995	METTL2A	55.3148	53.5637	56.887	52.3269	-0.0832003	1
ENSG00000088035	ALG6	32.7086	43.5765	50.732	42.1793	0.0424714	1
ENSG00000088038	CNOT3	13.2491	10.9766	11.5639	14.5039	0.0339033	1
ENSG00000088179	PTPN4	35.7311	35.9918	41.3441	44.7418	0.0680229	1
ENSG00000088205	DDX18	222.833	237.197	297.18	281.827	-0.00241796	1
ENSG00000088247	KHSRP	101.065	90.639	93.879	115.724	0.0815877	1
ENSG00000088256	GNA11	46.6615	40.6086	36.8677	54.4794	0.184557	1
ENSG00000088280	ASAP3	11.9242	10.6939	10.2583	9.27636	-0.154771	1
ENSG00000088298	EDEM2	128.723	134.781	107.246	88.5611	-0.0795799	1
ENSG00000088305	DNMT3B	6.33471	7.01934	5.4711	6.04757	0.141714	1
ENSG00000088325	TPX2	231.817	248.221	263.048	211.255	-0.106753	1
ENSG00000088356	PDRG1	16.8925	18.043	15.3564	19.7827	0.227425	1
ENSG00000088367	EPB41L1	12.5038	10.8823	12.1856	12.0439	-0.10816	1
ENSG00000088387	DOCK9	22.275	22.754	16.8485	18.7577	0.0815827	1
ENSG00000088448	ANKRD10	55.8945	48.1461	53.9027	64.2683	0.0332954	1
ENSG00000088451	TGDS	23.8069	24.1202	27.542	26.9066	-0.00717021	1
ENSG00000088538	DOCK3	5.0098	4.71097	4.16549	3.89505	-0.0983301	1
ENSG00000088543	C3orf18	4.34735	2.96791	2.67338	2.71628	-0.323072	1
ENSG00000088682	COQ9	72.0832	64.1163	74.7302	77.1835	-0.0552339	1
ENSG00000088727	KIF9	6.2933	6.97223	7.39841	6.61133	-0.00526315	1
ENSG00000088766	CRLS1	65.707	68.4975	78.4605	62.6795	-0.134909	1
ENSG00000088808	PPP1R13B	3.93331	4.00432	4.16549	3.17754	-0.167825	1
ENSG00000088812	ATRN	126.694	137.702	100.158	116.954	0.16604	1
ENSG00000088826	SMOX	44.3429	34.8612	22.4439	37.1055	0.104794	1
ENSG00000088832	FKBP1A	70.5512	75.1871	85.175	72.5709	-0.0745499	1
ENSG00000088833	NSFL1C	50.2222	43.9533	56.2653	57.5545	-0.0686531	1
ENSG00000088836	SLC4A11	25.2146	22.33	17.408	21.884	0.0476091	1
ENSG00000088854	C20orf194	9.81258	9.51616	6.71453	7.38009	0.0236539	1
ENSG00000088876	ZNF343	13.5389	12.013	15.3564	18.3477	0.0720976	1
ENSG00000088888	MAVS	71.3793	68.9215	66.337	69.4446	0.00619981	1
ENSG00000088899	LZTS3	4.26454	3.43901	2.11383	3.53629	0.108354	1
ENSG00000088930	XRN2	179.194	189.428	217.29	204.644	-0.0084237	1
ENSG00000088970	KIZ	13.5389	13.0023	14.9833	13.5302	-0.101956	1
ENSG00000088986	DYNLL1	157.498	164.837	227.361	184.246	-0.140223	1
ENSG00000088992	TESC	20.8673	17.195	15.2942	19.7827	0.0276248	1
ENSG00000089006	SNX5	251.152	258.679	313.034	288.644	-0.0435064	1
ENSG00000089009	RPL6	914.185	935.646	1180.51	1106.96	-0.0362505	1
ENSG00000089022	MAPKAPK5	80.1568	77.1186	82.999	76.3122	-0.08841	1
ENSG00000089041	P2RX7	3.68489	3.34479	2.85989	2.20378	-0.243738	1
ENSG00000089048	ESF1	37.5528	42.0218	52.4728	70.6234	0.32454	1
ENSG00000089050	RBBP9	25.049	26.0988	38.9194	31.4166	-0.150002	1
ENSG00000089053	ANAPC5	354.744	341.498	332.058	263.377	-0.183262	1
ENSG00000089057	SLC23A2	77.8796	83.4313	73.8598	80.6172	0.112184	1
ENSG00000089060	SLC8B1	21.5297	19.8332	12.5587	15.5289	0.0471586	1
ENSG00000089063	TMEM230	87.8164	100.014	97.5472	70.0596	-0.123473	1
ENSG00000089094	KDM2B	28.4855	28.4543	28.0394	32.4416	0.106788	1
ENSG00000089123	TASP1	8.98452	9.32772	11.2531	11.1214	0.0195131	1
ENSG00000089127	OAS1	90.2592	95.6798	91.9517	77.0809	-0.0765026	1
ENSG00000089154	GCN1	310.608	298.016	252.852	286.337	0.0522152	1
ENSG00000089157	RPLP0	1648.56	1524.23	1601.29	1883.72	0.0685144	1
ENSG00000089159	PXN	40.4924	36.8398	31.2723	37.413	0.0464091	1
ENSG00000089177	KIF16B	52.7892	53.4695	50.5455	47.4581	-0.0341923	1
ENSG00000089195	TRMT6	50.7191	47.675	66.3992	62.4745	-0.0874055	1
ENSG00000089220	PEBP1	147.893	142.837	162.019	152.112	-0.0711396	1
ENSG00000089234	BRAP	27.2434	27.4649	28.9719	31.4166	0.0673363	1
ENSG00000089248	ERP29	238.152	246.525	195.53	218.276	0.0996437	1
ENSG00000089280	FUS	84.3385	82.7717	80.6987	86.6136	0.0371882	1
ENSG00000089289	IGBP1	46.6615	44.7542	53.0945	48.2781	-0.0995929	1
ENSG00000089327	FXYD5	77.0102	76.883	52.7836	55.3507	0.0256167	1
ENSG00000089335	ZNF302	20.4118	19.6918	20.2679	20.449	-0.0195335	1
ENSG00000089351	GRAMD1A	23.4757	21.5762	15.2942	17.784	0.0173206	1
ENSG00000089486	CDIP1	3.14665	3.53323	2.79772	2.40878	-0.0027199	1
ENSG00000089597	GANAB	380.579	404.437	312.288	355.577	0.133237	1
ENSG00000089639	GMIP	3.7677	3.29768	2.42469	3.07504	0.020634	1
ENSG00000089682	RBM41	11.0961	10.4112	13.5534	13.3764	-0.0479435	1
ENSG00000089685	BIRC5	175.509	174.683	208.896	185.066	-0.0952526	1
ENSG00000089693	MLF2	53.1618	45.7435	46.3178	51.3531	-0.0365775	1
ENSG00000089737	DDX24	198.777	202.901	218.595	191.421	-0.0817077	1
ENSG00000089775	ZBTB25	24.3037	23.8846	29.4071	32.9029	0.0818794	1
ENSG00000089818	NECAP1	25.3388	22.8953	28.7233	25.9841	-0.143857	1
ENSG00000089820	ARHGAP4	56.6397	49.5594	35.9352	49.3031	0.0917589	1
ENSG00000089876	DHX32	46.7857	47.6279	52.2863	48.6368	-0.0403258	1
ENSG00000089902	RCOR1	65.4586	65.2469	74.3572	65.2421	-0.0986325	1
ENSG00000089916	GPATCH2L	55.5218	51.0198	46.6287	61.142	0.133293	1
ENSG00000090006	LTBP4	19.6252	13.7089	7.39841	11.6851	-0.0964779	1
ENSG00000090013	BLVRB	72.6628	62.4674	59.1873	73.0834	0.0384072	1
ENSG00000090020	SLC9A1	13.6217	11.9659	10.7557	13.7352	0.0702278	1
ENSG00000090054	SPTLC1	246.681	296.603	268.705	226.989	0.0230032	1
ENSG00000090060	PAPOLA	216.995	228.718	268.395	230.525	-0.0795044	1
ENSG00000090061	CCNK	9.43995	9.84592	10.1961	8.96886	-0.0588966	1
ENSG00000090097	PCBP4	3.22946	2.68525	2.36252	2.40878	-0.150021	1
ENSG00000090263	MRPS33	47.738	52.4802	63.7258	52.3269	-0.0868079	1
ENSG00000090266	NDUFB2	55.0664	58.9813	69.0104	63.2433	-0.0202452	1
ENSG00000090273	NUDC	120.07	107.127	130.747	132.483	-0.0658004	1
ENSG00000090316	MAEA	57.7576	55.6365	60.4307	66.9846	0.0531905	1
ENSG00000090339	ICAM1	3.47788	2.96791	1.05692	3.22879	0.416976	1
ENSG00000090372	STRN4	39.6644	29.9147	31.1479	38.438	-0.053717	1
ENSG00000090432	MUL1	51.2987	51.3496	43.8309	46.3818	0.0375153	1
ENSG00000090447	TFAP4	16.2715	15.3578	15.7916	24.0365	0.295427	1
ENSG00000090470	PDCD7	26.4153	27.7005	29.718	30.9554	0.0649117	1
ENSG00000090487	SPG21	105.082	101.333	100.345	85.5886	-0.136223	1
ENSG00000090520	DNAJB11	131.207	155.698	131.12	127.409	0.110105	1
ENSG00000090530	P3H2	295.744	319.922	270.757	232.985	-0.0350718	1
ENSG00000090565	RAB11FIP3	29.1479	24.1673	20.7653	31.1604	0.144079	1
ENSG00000090581	GNPTG	25.5872	23.9317	18.0297	20.859	0.0342648	1
ENSG00000090612	ZNF268	32.5844	32.8826	39.9763	45.8181	0.11851	1
ENSG00000090615	GOLGA3	131.994	127.903	110.168	111.06	-0.0197418	1
ENSG00000090621	PABPC4	223.081	216.846	227.548	218.789	-0.0487805	1
ENSG00000090661	CERS4	5.63085	4.19276	3.85464	3.8438	-0.252573	1
ENSG00000090674	MCOLN1	7.4526	6.45403	5.84413	7.43134	0.0531532	1
ENSG00000090686	USP48	48.2763	50.4545	53.9027	43.5118	-0.119505	1
ENSG00000090776	EFNB1	14.2013	14.4627	9.01487	14.2989	0.299699	1
ENSG00000090857	PDPR	40.3268	42.8227	36.8056	39.873	0.0994508	1
ENSG00000090861	AARS	150.294	135.864	129.876	186.194	0.200477	1
ENSG00000090863	GLG1	220.762	244.923	182.163	179.89	0.0760805	1
ENSG00000090889	KIF4A	94.3995	103.547	135.223	107.626	-0.119844	1
ENSG00000090905	TNRC6A	88.5617	87.7182	89.527	96.0949	0.045601	1
ENSG00000090924	PLEKHG2	20.0392	17.9959	11.2531	12.6077	-0.0368797	1
ENSG00000090932	DLL3	6.16909	5.18207	4.97372	5.17631	-0.113884	1
ENSG00000090971	NAT14	9.68837	8.33841	5.28458	5.07381	-0.167156	1
ENSG00000090975	PITPNM2	13.1663	12.8138	9.69876	13.0689	0.171282	1
ENSG00000090989	EXOC1	46.7443	48.2874	53.1567	53.3007	0.0252237	1
ENSG00000091009	RBM27	37.5528	33.6834	45.8826	44.6393	-0.0899513	1
ENSG00000091039	OSBPL8	113.486	107.975	130.436	144.937	0.0524728	1
ENSG00000091073	DTX2	2.4428	2.35548	1.49212	2.66503	0.320089	1
ENSG00000091127	PUS7	99.4093	97.6113	121.11	119.158	-0.0241627	1
ENSG00000091129	NRCAM	371.47	405.944	280.332	309.605	0.134412	1
ENSG00000091136	LAMB1	640.468	659.96	460.318	524.14	0.105099	1
ENSG00000091137	SLC26A4	1.36631	1.9315	1.11909	1.02501	0.244187	1
ENSG00000091140	DLD	462.227	535.826	509.62	392.221	-0.0664055	1
ENSG00000091157	WDR7	16.2715	15.5462	18.7758	15.0677	-0.192002	1
ENSG00000091164	TXNL1	68.5639	68.8273	99.5988	80.6172	-0.168997	1
ENSG00000091317	CMTM6	201.013	241.955	238.863	154.162	-0.150815	1
ENSG00000091409	ITGA6	674.874	757.571	564.953	487.804	0.00640308	1
ENSG00000091428	RAPGEF4	10.475	10.0344	8.76619	6.20133	-0.246174	1
ENSG00000091436		134.726	135.205	128.882	121.669	-0.0374104	1
ENSG00000091483	FH	340.17	382.154	349.964	297.869	-0.0211967	1
ENSG00000091490	SEL1L3	285.062	318.98	238.801	240.314	0.0942524	1
ENSG00000091527	CDV3	182.175	190.323	240.48	245.132	0.0433815	1
ENSG00000091542	ALKBH5	93.3231	81.9709	85.8589	89.7911	-0.0616042	1
ENSG00000091640	SPAG7	30.6384	29.3493	30.3397	29.1104	-0.060963	1
ENSG00000091651	ORC6	67.4046	68.1206	86.5428	82.3598	-0.0319233	1
ENSG00000091656	ZFHX4	3.68489	3.43901	3.97898	2.87004	-0.274042	1
ENSG00000091732	ZC3HC1	29.3963	28.0303	36.4325	34.4404	-0.0738852	1
ENSG00000091947	TMEM101	42.1072	41.9747	30.6506	35.5679	0.0892963	1
ENSG00000091986	CCDC80	25.463	32.5528	28.1637	28.7004	0.193792	1
ENSG00000092010	PSME1	87.0712	86.5405	88.2214	88.6636	-0.000677912	1
ENSG00000092020	PPP2R3C	21.7367	21.6705	26.1742	24.8566	-0.0398045	1
ENSG00000092036	HAUS4	19.9978	20.1158	20.3301	18.399	-0.0656277	1
ENSG00000092094	OSGEP	39.5402	36.5571	36.246	39.668	0.0070512	1
ENSG00000092098	RNF31	10.5992	6.8309	7.83362	11.4289	-0.0201161	1
ENSG00000092108	SCFD1	77.921	75.9879	104.759	85.9473	-0.172745	1
ENSG00000092140	G2E3	104.502	108.588	114.52	112.751	0.0155748	1
ENSG00000092148	HECTD1	351.224	363.216	372.283	387.301	0.0529386	1
ENSG00000092199	HNRNPC	737.848	760.492	940.469	816.884	-0.0893776	1
ENSG00000092201	SUPT16H	417.594	434.54	543.317	462.691	-0.0987364	1
ENSG00000092203	TOX4	53.4931	52.0091	57.1978	61.4495	0.0359135	1
ENSG00000092208	GEMIN2	20.2462	21.7176	31.894	24.4466	-0.171333	1
ENSG00000092295	TGM1	2.77402	1.97861	3.60595	3.28004	-0.272244	1
ENSG00000092330	TINF2	27.1192	27.3236	30.6506	28.5466	-0.0464476	1
ENSG00000092439	TRPM7	185.197	192.349	199.819	199.109	0.0241174	1
ENSG00000092445	TYRO3	112.741	116.502	105.008	114.186	0.0829519	1
ENSG00000092470	WDR76	57.592	59.8764	86.5428	66.3183	-0.190167	1
ENSG00000092531	SNAP23	27.1606	29.1138	30.4641	26.6503	-0.0454104	1
ENSG00000092621	PHGDH	71.2137	58.416	47.2504	87.2798	0.296777	1
ENSG00000092758	COL9A3	2.23578	2.35548	1.55429	1.43502	-0.0147342	1
ENSG00000092820	EZR	718.72	728.033	644.222	547.305	-0.0958696	1
ENSG00000092841	MYL6	183.872	194.751	196.835	195.675	0.036547	1
ENSG00000092847	AGO1	30.8041	29.9147	32.2049	32.3904	-0.0157765	1
ENSG00000092853	CLSPN	47.0342	48.0519	60.8038	58.9382	-0.0099274	1
ENSG00000092871	RFFL	25.0904	23.1309	31.0858	27.5728	-0.145554	1
ENSG00000092931	MFSD11	33.9093	38.9126	39.4789	33.9279	-0.00858775	1
ENSG00000092964	DPYSL2	131.911	130.682	158.351	148.576	-0.0553567	1
ENSG00000092969	TGFB2	59.0411	60.2533	49.9238	64.832	0.197556	1
ENSG00000092978	GPATCH2	35.524	32.7883	41.4063	39.873	-0.0811765	1
ENSG00000093000	NUP50	107.731	109.153	141.689	126.948	-0.0784672	1
ENSG00000093009	CDC45	39.5402	42.2103	48.4316	46.6381	0.0157635	1
ENSG00000093010	COMT	72.2902	73.9622	44.3905	63.0383	0.229518	1
ENSG00000093144	ECHDC1	60.0762	62.279	80.2013	71.8021	-0.0637224	1
ENSG00000093167	LRRFIP2	30.6384	32.4115	40.5359	37.413	-0.0250837	1
ENSG00000093183	SEC22C	110.174	124.04	123.97	88.0998	-0.141766	1
ENSG00000093217	XYLB	5.87927	5.74738	5.0359	5.58632	0.0478291	1
ENSG00000094631	HDAC6	20.0806	16.5355	13.9264	12.9152	-0.211578	1
ENSG00000094804	CDC6	83.8003	93.8896	136.031	126.845	0.00665438	1
ENSG00000094841	UPRT	11.0961	12.5312	13.7399	10.4039	-0.108797	1
ENSG00000094880	CDC23	62.6846	70.2405	84.802	73.8009	-0.032585	1
ENSG00000094914	AAAS	57.4264	51.2553	55.084	56.4782	-0.0631719	1
ENSG00000094916	CBX5	238.98	241.578	288.103	231.602	-0.1553	1
ENSG00000094975	SUCO	160.81	167.004	155.118	143.604	-0.0245162	1
ENSG00000095002	MSH2	88.3133	92.4763	134.291	106.396	-0.161644	1
ENSG00000095015	MAP3K1	19.6252	19.3621	22.7548	19.5777	-0.119398	1
ENSG00000095059	DHPS	26.2083	22.8011	17.3459	24.4466	0.111827	1
ENSG00000095066	HOOK2	3.64349	3.01502	2.67338	2.87004	-0.117784	1
ENSG00000095139	ARCN1	129.303	119.47	131.99	112.188	-0.173522	1
ENSG00000095203	EPB41L4B	15.7747	21.8118	18.5271	17.784	0.210861	1
ENSG00000095209	TMEM38B	168.718	216.94	197.395	149.601	0.00209473	1
ENSG00000095261	PSMD5	56.0601	61.1955	73.3624	62.4233	-0.0645569	1
ENSG00000095303	PTGS1	4.92699	4.3812	2.30035	1.79377	-0.236007	1
ENSG00000095319	NUP188	170.085	160.738	161.273	150.626	-0.0899076	1
ENSG00000095321	CRAT	48.2349	40.5614	28.7233	28.2903	-0.162423	1
ENSG00000095380	NANS	52.9962	51.7264	55.6435	57.5032	0.00807289	1
ENSG00000095383	TBC1D2	19.7494	16.9595	8.39316	11.4289	0.0076736	1
ENSG00000095397	WHRN	8.86031	5.93582	3.79246	5.74007	-0.130449	1
ENSG00000095485	CWF19L1	57.9646	62.2319	73.1137	63.602	-0.0574438	1
ENSG00000095564	BTAF1	107.276	101.992	116.883	126.333	0.0267478	1
ENSG00000095574	IKZF5	10.8891	11.7303	13.4291	12.8639	0.0210244	1
ENSG00000095739	BAMBI	8.94311	10.4112	6.27933	7.32884	0.213431	1
ENSG00000095787	WAC	105.289	109.86	116.509	107.319	-0.0298601	1
ENSG00000095794	CREM	113.693	124.322	106.562	76.9784	-0.129735	1
ENSG00000095906	NUBP2	26.3325	18.4199	21.2005	26.0353	-0.100207	1
ENSG00000095951	HIVEP1	15.6919	15.876	17.2837	22.8578	0.232677	1
ENSG00000096060	FKBP5	31.6735	31.799	44.0796	36.2342	-0.152581	1
ENSG00000096063	SRPK1	178.986	191.972	217.414	202.184	-0.00780219	1
ENSG00000096070	BRPF3	8.07364	7.302	6.65236	11.2751	0.32816	1
ENSG00000096080	MRPS18A	30.9697	31.799	28.6611	37.003	0.204858	1
ENSG00000096092	TMEM14A	31.8805	38.7713	47.3125	25.3178	-0.302259	1
ENSG00000096093	EFHC1	12.7522	12.6725	12.7452	12.3514	-0.0269014	1
ENSG00000096384	HSP90AB1	2658.09	2796.29	3144.08	2485.55	-0.135522	1
ENSG00000096401	CDC5L	74.2775	74.2449	88.4079	84.9223	-0.0307377	1
ENSG00000096433	ITPR3	165.862	152.447	109.546	155.136	0.158403	1
ENSG00000096654	ZNF184	15.6919	15.3106	17.9676	14.6064	-0.166861	1
ENSG00000096717	SIRT1	36.7661	37.0282	43.8931	44.178	0.0112395	1
ENSG00000096746	HNRNPH3	112.658	95.9624	112.095	104.5	-0.165117	1
ENSG00000096872	IFT74	14.5326	13.1436	18.0297	18.4502	-0.0411144	1
ENSG00000096968	JAK2	12.2968	12.7667	13.6156	13.2739	0.00929069	1
ENSG00000097007	ABL1	125.866	118.434	98.3554	107.524	0.0103145	1
ENSG00000097021	ACOT7	25.5044	21.1522	21.2627	23.9853	-0.0545637	1
ENSG00000097033	SH3GLB1	40.3682	41.8334	50.6698	45.9206	-0.0509754	1
ENSG00000097046	CDC7	43.5149	47.7221	66.8966	58.682	-0.0515833	1
ENSG00000097096	SYDE2	10.7649	11.0708	10.6935	13.3252	0.183858	1
ENSG00000099139	PCSK5	37.9668	41.645	37.0542	38.7455	0.0995757	1
ENSG00000099194	SCD	1990.22	2245.06	1738.01	1090.05	-0.160751	1
ENSG00000099203	TMED1	39.9128	35.0967	28.1637	33.2617	0.0027409	1
ENSG00000099204	ABLIM1	115.432	122.014	138.207	142.323	0.0601256	1
ENSG00000099219	ERMP1	97.3392	108.918	94.2521	81.4885	-0.00884078	1
ENSG00000099246	RAB18	143.09	143.826	159.781	129.152	-0.149504	1
ENSG00000099250	NRP1	15.195	16.8653	9.63659	16.964	0.437208	1
ENSG00000099256	PRTFDC1	15.195	17.1479	24.4956	19.9877	-0.0906213	1
ENSG00000099260	PALMD	6.62453	6.17137	7.14973	4.61256	-0.348165	1
ENSG00000099282	TSPAN15	59.4966	59.688	52.1619	45.9718	-0.0802361	1
ENSG00000099284	H2AFY2	21.8609	23.9317	23.19	22.6015	0.0478734	1
ENSG00000099290	FAM21A	62.4776	61.9963	54.5866	63.602	0.100275	1
ENSG00000099308	MAST3	4.43015	3.67456	2.92206	3.69005	-0.0148282	1
ENSG00000099326	MZF1	8.94311	5.41761	3.48161	7.63634	0.0569507	1
ENSG00000099330	OCEL1	2.19438	2.63814	1.92732	1.84502	0.117016	1
ENSG00000099331	MYO9B	43.8461	40.1375	31.7075	36.593	0.0193017	1
ENSG00000099337	KCNK6	1.90455	2.07283	1.36777	1.12751	-0.0434958	1
ENSG00000099341	PSMD8	81.8129	77.6839	86.2319	90.9699	0.00534312	1
ENSG00000099364	FBXL19	9.27434	8.80951	9.01487	10.1476	0.0498794	1
ENSG00000099377	HSD3B7	24.3865	19.1736	14.9833	15.7339	-0.178221	1
ENSG00000099381	SETD1A	13.1248	11.2592	11.0665	12.7102	-0.0179027	1
ENSG00000099385	BCL7C	34.5304	29.9618	31.5831	39.9242	0.0784515	1
ENSG00000099399	MAGEB2	74.94	75.5639	87.4754	81.5398	-0.0471338	1
ENSG00000099622	CIRBP	65.5414	55.4952	58.8143	71.9559	0.0344693	1
ENSG00000099624	ATP5D	31.0525	19.9745	22.6926	28.5979	-0.149906	1
ENSG00000099625	CBARP	3.51928	2.9208	1.24343	3.07504	0.297108	1
ENSG00000099725	PRKY	19.5424	17.4777	19.5219	17.4765	-0.160351	1
ENSG00000099783	HNRNPM	192.898	188.345	224.191	211.409	-0.0609824	1
ENSG00000099785	2002-03-01	3.31226	2.63814	2.176	2.81878	-0.0290529	1
ENSG00000099795	NDUFB7	32.4188	27.6063	28.0394	33.6204	0.0158155	1
ENSG00000099797	TECR	62.519	57.0027	45.6961	47.9706	-0.0456329	1
ENSG00000099800	TIMM13	34.489	26.8996	26.9825	38.6942	0.0905471	1
ENSG00000099804	CDC34	25.0904	19.5034	18.6515	22.6528	-0.05807	1
ENSG00000099810	MTAP	102.473	105.337	119.494	113.93	-0.0170542	1
ENSG00000099812	MISP	40.658	37.3109	30.4019	44.7418	0.204151	1
ENSG00000099814	CEP170B	23.3101	18.6554	14.486	24.2928	0.178248	1
ENSG00000099817	POLR2E	68.6053	53.3753	57.8195	69.4446	-0.0431717	1
ENSG00000099821	POLRMT	81.4817	66.6131	44.5148	59.707	0.0017699	1
ENSG00000099849	RASSF7	2.77402	3.25057	1.98949	3.48504	0.477033	1
ENSG00000099860	GADD45B	19.1283	15.7817	9.01487	16.6565	0.198748	1
ENSG00000099864	PALM	6.2105	5.60605	2.54903	3.48504	0.0412911	1
ENSG00000099875	MKNK2	72.4972	62.4203	36.1838	49.4056	0.0393283	1
ENSG00000099889	ARVCF	3.35367	1.79017	2.11383	2.20378	-0.473577	1
ENSG00000099899	TRMT2A	28.8995	23.9317	20.8896	30.2891	0.118601	1
ENSG00000099901	RANBP1	147.189	154.991	198.389	161.029	-0.128375	1
ENSG00000099904	ZDHHC8	12.1312	10.1757	6.83887	10.1476	0.0891803	1
ENSG00000099910	KLHL22	6.91435	5.79449	5.09807	7.43134	0.127253	1
ENSG00000099917	MED15	16.5199	15.3106	10.9422	16.349	0.198244	1
ENSG00000099937	SERPIND1	23.7655	22.0473	14.2995	15.0677	-0.0403956	1
ENSG00000099940	SNAP29	20.2462	19.6918	20.9518	19.219	-0.0815801	1
ENSG00000099942	CRKL	122.678	117.115	100.283	100.195	-0.0376546	1
ENSG00000099949	LZTR1	19.7494	16.4413	15.9159	18.5527	-0.0320392	1
ENSG00000099953	MMP11	2.15297	1.74306	1.42995	1.12751	-0.334304	1
ENSG00000099956	SMARCB1	26.2083	25.8161	28.1637	33.3642	0.122575	1
ENSG00000099957	P2RX6	5.25822	6.54825	3.66812	3.8438	0.211354	1
ENSG00000099958	DERL3	2.4842	1.97861	1.61646	3.53629	0.400923	1
ENSG00000099968	BCL2L13	78.9975	75.8466	81.2582	67.5996	-0.159509	1
ENSG00000099977	DDT	14.4498	13.6147	13.3669	15.1702	0.0468009	1
ENSG00000099991	CABIN1	33.4539	27.3236	26.0499	27.2653	-0.127578	1
ENSG00000099992	TBC1D10A	2.4428	1.36618	1.42995	1.48627	-0.473239	1
ENSG00000099995	SF3A1	66.4523	67.9322	70.3782	75.5434	0.0686793	1
ENSG00000099999	RNF215	30.2244	29.3493	12.6208	18.9115	0.168161	1
ENSG00000100003	SEC14L2	4.09893	3.62745	3.23292	3.89505	0.0244748	1
ENSG00000100014	SPECC1L	13.8701	11.6832	13.1182	18.1427	0.14174	1
ENSG00000100023	PPIL2	17.762	18.2786	17.2837	20.1927	0.133543	1
ENSG00000100028	SNRPD3	86.3259	82.442	107.992	97.3249	-0.111542	1
ENSG00000100029	PES1	102.183	89.3671	104.51	127.87	0.0716214	1
ENSG00000100030	MAPK1	143.297	141.376	166.682	156.263	-0.0582047	1
ENSG00000100031	GGT1	45.0882	41.1739	29.0963	35.8242	0.0506234	1
ENSG00000100034	PPM1F	45.8335	40.1375	36.1838	49.2519	0.121525	1
ENSG00000100036	SLC35E4	13.1663	11.1179	7.46059	10.4551	0.055184	1
ENSG00000100038	TOP3B	15.7333	12.9552	15.5429	17.2202	-0.0530974	1
ENSG00000100056	DGCR14	10.8063	12.1543	9.69876	11.4801	0.201919	1
ENSG00000100058	CRYBB2P1	6.16909	6.03004	5.34675	7.17509	0.191247	1
ENSG00000100065	CARD10	5.25822	3.58034	3.91681	4.61256	-0.176533	1
ENSG00000100068	LRP5L	5.25822	4.61675	3.23292	5.33007	0.209151	1
ENSG00000100075	SLC25A1	64.7962	52.1033	47.5612	53.8644	-0.0867449	1
ENSG00000100077	GRK3	12.1726	12.5312	13.2425	12.3514	-0.0281631	1
ENSG00000100083	GGA1	32.8742	26.3343	23.8739	30.1354	-0.0112373	1
ENSG00000100084	HIRA	5.67225	6.03004	6.46584	5.94507	-0.0140853	1
ENSG00000100092	SH3BP1	1.78034	1.4604	2.42469	1.79377	-0.35304	1
ENSG00000100097	LGALS1	209.004	202.336	182.909	181.632	-0.0298109	1
ENSG00000100099	HPS4	35.2756	34.343	34.1322	35.4142	0.00669185	1
ENSG00000100104	SRRD	24.1795	26.0045	26.2364	29.1616	0.130891	1
ENSG00000100105	PATZ1	19.501	19.1736	15.7294	18.2452	0.0828537	1
ENSG00000100106	TRIOBP	20.1634	16.0173	15.1699	17.8865	-0.0650092	1
ENSG00000100109	TFIP11	28.5683	25.345	28.4746	33.2617	0.03825	1
ENSG00000100116	GCAT	6.87295	6.7838	5.71978	5.94507	0.00996524	1
ENSG00000100124	ANKRD54	9.77118	8.99795	10.0718	9.78887	-0.078489	1
ENSG00000100129	EIF3L	54.3211	61.5724	73.0516	64.8833	-0.00856627	1
ENSG00000100138	SNU13	79.867	78.9087	83.7451	88.0486	0.0293629	1
ENSG00000100139	MICALL1	8.65329	8.90373	6.27933	8.35385	0.199085	1
ENSG00000100147	CCDC134	10.5164	9.56327	9.57442	9.22511	-0.099275	1
ENSG00000100150	DEPDC5	10.268	8.71529	10.5692	11.2751	-0.0604809	1
ENSG00000100151	PICK1	5.0098	4.09854	3.66812	5.38132	0.113329	1
ENSG00000100154	TTC28	20.7845	20.7283	15.9781	16.349	0.00877227	1
ENSG00000100162	CENPM	13.3733	13.332	11.4396	15.7339	0.223354	1
ENSG00000100196	KDELR3	37.5114	43.9062	29.6558	20.859	-0.0529296	1
ENSG00000100201	DDX17	175.136	177.462	197.519	202.389	0.0278062	1
ENSG00000100207	TCF20	56.7639	51.4909	50.6076	57.1957	0.0162772	1
ENSG00000100209	HSCB	7.12137	6.54825	8.20664	8.76386	0.000968807	1
ENSG00000100211	CBY1	4.26454	4.3812	4.72504	4.81756	0.0370405	1
ENSG00000100216	TOMM22	58.9583	64.1163	74.9167	68.9321	-0.00765634	1
ENSG00000100219	XBP1	204.946	217.694	145.854	162.977	0.1175	1
ENSG00000100220	RTCB	81.9371	81.3584	92.5734	93.5837	0.00405813	1
ENSG00000100221	JOSD1	54.7766	55.5423	59.1873	59.0407	0.00842779	1
ENSG00000100225	FBXO7	62.5604	58.5573	64.7206	65.7546	-0.0339747	1
ENSG00000100226	GTPBP1	11.8413	9.98725	9.20139	11.0189	-0.00812176	1
ENSG00000100227	POLDIP3	39.2089	33.7776	31.5831	41.513	0.0860451	1
ENSG00000100228	RAB36	1.61473	1.03641	1.42995	2.10128	0.0262817	1
ENSG00000100239	PPP6R2	31.8805	28.5956	30.7749	30.4429	-0.0865176	1
ENSG00000100241	SBF1	72.166	63.9278	52.0998	73.4422	0.142539	1
ENSG00000100242	SUN2	41.1549	42.2574	23.6874	31.0066	0.173462	1
ENSG00000100243	CYB5R3	57.385	56.1076	40.598	40.693	-0.0191934	1
ENSG00000100258	LMF2	49.891	44.9426	32.0183	41.5643	0.0756094	1
ENSG00000100263	RHBDD3	39.4574	29.3022	27.7907	40.4367	0.0489737	1
ENSG00000100266	PACSIN2	39.623	38.7713	36.619	43.0505	0.100625	1
ENSG00000100280	AP1B1	62.9744	51.3024	52.2863	59.1432	-0.0632556	1
ENSG00000100281	HMGXB4	32.129	36.1331	30.8993	31.8779	0.109518	1
ENSG00000100284	TOM1	12.835	10.8352	11.7504	14.8114	0.0575154	1
ENSG00000100285	NEFH	1.73894	1.97861	2.79772	2.30628	-0.0566102	1
ENSG00000100292	HMOX1	30.5556	25.5806	38.4842	70.8796	0.482707	1
ENSG00000100294	MCAT	14.6568	13.5205	14.7347	19.1165	0.149914	1
ENSG00000100296	THOC5	63.2229	62.2319	69.3213	73.3397	0.032982	1
ENSG00000100297	MCM5	88.6445	78.4847	94.3764	112.7	0.0629367	1
ENSG00000100299	ARSA	8.90171	5.8416	4.16549	6.04757	-0.150008	1
ENSG00000100300	TSPO	97.1322	81.2171	51.4159	72.5196	0.047918	1
ENSG00000100304	TTLL12	105.371	88.6604	90.3974	117.108	0.0710276	1
ENSG00000100316	RPL3	951.862	852.356	842.611	985.242	0.0341862	1
ENSG00000100319	ZMAT5	6.83155	6.21848	5.40892	7.17509	0.12037	1
ENSG00000100320	RBFOX2	59.745	54.129	55.7679	59.2457	-0.0277489	1
ENSG00000100321	SYNGR1	13.9115	12.3898	9.3879	8.61011	-0.154356	1
ENSG00000100324	TAB1	13.3319	11.2592	11.0044	12.6589	-0.0299778	1
ENSG00000100325	ASCC2	28.6925	22.1416	23.1278	26.5478	-0.0931575	1
ENSG00000100330	MTMR3	25.0904	23.1309	16.4755	20.449	0.0631399	1
ENSG00000100335	MIEF1	77.5898	73.2556	77.4036	78.3622	-0.0318783	1
ENSG00000100342	APOL1	11.2203	12.5312	7.46059	8.55886	0.16841	1
ENSG00000100344	PNPLA3	3.56068	3.25057	1.98949	2.05003	-0.0840843	1
ENSG00000100345	MYH9	400.784	369.952	299.045	371.67	0.0833498	1
ENSG00000100347	SAMM50	43.5977	40.1846	49.7372	44.2805	-0.142904	1
ENSG00000100348	TXN2	24.1795	22.0002	23.19	23.7803	-0.0502657	1
ENSG00000100350	FOXRED2	46.6201	52.5273	50.8563	45.8181	0.0139383	1
ENSG00000100353	EIF3D	208.631	198.567	220.958	244.107	0.0433225	1
ENSG00000100354	TNRC6B	27.1192	26.193	22.6926	24.7028	0.0285559	1
ENSG00000100359	SGSM3	16.8097	15.5462	11.8748	14.2989	0.0508835	1
ENSG00000100360	IFT27	12.9592	10.7881	10.0718	10.8139	-0.098792	1
ENSG00000100364	KIAA0930	59.745	56.0134	56.887	55.3507	-0.0671104	1
ENSG00000100372	SLC25A17	72.2488	85.1272	84.802	77.9522	0.0554256	1
ENSG00000100376	FAM118A	19.9978	21.7647	19.5219	19.7827	0.0720544	1
ENSG00000100379	KCTD17	2.77402	2.16705	1.80297	2.66503	0.0503235	1
ENSG00000100380	ST13	210.039	209.261	255.836	223.914	-0.104647	1
ENSG00000100387	RBX1	32.543	35.8505	40.225	34.1842	-0.0526284	1
ENSG00000100393	EP300	28.1542	28.8782	23.8739	26.1378	0.0784379	1
ENSG00000100395	L3MBTL2	41.5275	36.3216	43.8309	48.5343	-0.00855204	1
ENSG00000100401	RANGAP1	93.2402	82.3948	81.3204	109.881	0.138588	1
ENSG00000100403	ZC3H7B	65.8727	54.977	51.9754	69.0859	0.0722592	1
ENSG00000100410	PHF5A	49.7254	52.2918	56.4518	56.8882	0.0412079	1
ENSG00000100412	ACO2	190.869	192.82	136.404	158.826	0.103022	1
ENSG00000100413	POLR3H	33.6195	33.4479	33.324	40.488	0.142739	1
ENSG00000100416	TRMU	36.9318	35.1909	37.1786	45.0493	0.114225	1
ENSG00000100417	PMM1	9.39855	8.2442	6.71453	7.94385	-0.0015397	1
ENSG00000100418	DESI1	53.7829	51.7264	60.4307	62.577	0.00177184	1
ENSG00000100422	CERK	24.8006	27.4649	28.5989	32.7492	0.174848	1
ENSG00000100425	BRD1	33.0812	30.1031	27.169	30.8529	0.0141746	1
ENSG00000100426	ZBED4	39.9542	39.9961	33.2618	40.3855	0.132433	1
ENSG00000100439	ABHD4	30.8455	26.6641	28.5367	31.6216	-0.0285351	1
ENSG00000100441	KHNYN	106.945	97.6113	73.922	88.0998	0.0368688	1
ENSG00000100442	FKBP3	102.308	114.759	128.384	102.86	-0.0832655	1
ENSG00000100445	SDR39U1	11.5515	9.98725	11.4396	13.0177	-0.000626007	1
ENSG00000100461	RBM23	51.8369	45.3666	59.6847	59.6557	-0.0860615	1
ENSG00000100462	PRMT5	159.237	152.07	193.229	200.031	-0.00121292	1
ENSG00000100473	COCH	82.0614	96.9988	77.6523	76.2097	0.116953	1
ENSG00000100478	AP4S1	10.1852	9.18639	11.8748	12.8639	0.000980481	1
ENSG00000100479	POLE2	31.0525	32.8826	43.2714	35.5167	-0.117411	1
ENSG00000100483	VCPKMT	14.0771	14.9338	15.8537	15.4777	0.0256505	1
ENSG00000100485	SOS2	21.2399	22.33	20.8275	20.3465	0.0207116	1
ENSG00000100490	CDKL1	16.8511	15.6404	14.7968	16.4515	0.0168347	1
ENSG00000100503	NIN	155.055	158.477	159.284	194.701	0.168042	1
ENSG00000100504	PYGL	219.934	222.216	219.341	217.61	0.00181185	1
ENSG00000100519	PSMC6	131	141.989	198.265	165.488	-0.0981471	1
ENSG00000100522	GNPNAT1	135.182	143.355	183.157	165.283	-0.0440057	1
ENSG00000100523	DDHD1	35.6068	33.7776	36.4325	39.2067	0.0187147	1
ENSG00000100526	CDKN3	86.6985	98.2708	109.36	76.9784	-0.160733	1
ENSG00000100528	CNIH1	330.191	402.27	371.537	299.816	0.000919294	1
ENSG00000100532	CGRRF1	27.3676	31.6106	28.3502	19.629	-0.119627	1
ENSG00000100554	ATP6V1D	59.9106	73.4911	70.5647	61.4495	0.0499283	1
ENSG00000100558	PLEK2	4.63717	4.05143	3.54378	5.17631	0.15964	1
ENSG00000100564	PIGH	41.3619	46.9212	52.1619	36.4904	-0.162825	1
ENSG00000100567	PSMA3	201.51	225.938	249.805	215.253	-0.0323024	1
ENSG00000100568	VTI1B	46.6615	49.7007	59.5603	53.0444	-0.0461852	1
ENSG00000100575	TIMM9	32.6258	36.5571	43.7066	40.5905	0.0180264	1
ENSG00000100577	GSTZ1	12.0898	9.18639	9.88528	11.6339	-0.0839545	1
ENSG00000100578	KIAA0586	51.2987	55.9663	55.2705	48.9956	-0.0209884	1
ENSG00000100580	TMED8	82.7238	79.1443	91.0813	86.3573	-0.0701535	1
ENSG00000100583	SAMD15	1.61473	1.9315	2.36252	2.56253	0.194076	1
ENSG00000100591	AHSA1	186.108	199.415	238.117	214.125	-0.0363796	1
ENSG00000100592	DAAM1	2.69121	2.30837	1.24343	2.56253	0.270515	1
ENSG00000100596	SPTLC2	109.098	120.931	98.3554	76.6709	-0.0702139	1
ENSG00000100599	RIN3	2.15297	1.64884	1.49212	1.99877	-0.0274175	1
ENSG00000100600	LGMN	85.8291	93.0887	70.3782	74.0572	0.0968614	1
ENSG00000100601	ALKBH1	17.4722	16.9124	20.641	21.2178	0.00278766	1
ENSG00000100603	SNW1	93.8613	97.0931	114.582	107.216	-0.0281141	1
ENSG00000100604	CHGA	34.8616	33.6363	29.8423	40.3855	0.191611	1
ENSG00000100605	ITPK1	144.87	119.894	114.271	128.793	-0.0602624	1
ENSG00000100612	DHRS7	135.596	151.929	123.846	104.551	-0.0166047	1
ENSG00000100614	PPM1A	59.3723	60.3946	68.14	56.8369	-0.120132	1
ENSG00000100625	SIX4	25.256	22.6127	23.7495	25.2666	-0.0350163	1
ENSG00000100626	GALNT16	73.7393	69.0157	48.2451	52.3781	-0.00867189	1
ENSG00000100629	CEP128	11.9656	11.165	17.1593	16.964	-0.0463807	1
ENSG00000100632	ERH	193.643	215.621	259.007	223.658	-0.042805	1
ENSG00000100644	HIF1A	149.632	151.646	162.019	157.596	-0.0109561	1
ENSG00000100647	SUSD6	10.8477	12.4841	8.82836	8.2001	0.0700249	1
ENSG00000100650	SRSF5	172.279	161.398	181.976	186.45	-0.0262651	1
ENSG00000100664	EIF5	544.288	538.04	899.684	800.842	-0.108917	1
ENSG00000100697	DICER1	120.318	124.699	128.073	128.075	0.0254801	1
ENSG00000100711	ZFYVE21	23.5999	24.6384	22.0087	18.7577	-0.0719236	1
ENSG00000100714	MTHFD1	211.24	208.931	238.428	215.304	-0.0837603	1
ENSG00000100722	ZC3H14	96.0971	97.1402	132.239	125.872	-0.0333006	1
ENSG00000100726	TELO2	28.1542	24.4028	22.1331	30.5966	0.125335	1
ENSG00000100731	PCNX1	156.215	179.158	149.585	136.07	0.0438361	1
ENSG00000100744	GSKIP	36.8075	42.1161	42.2145	36.2342	-0.0103659	1
ENSG00000100749	VRK1	53.6173	57.992	75.4141	63.5508	-0.0844004	1
ENSG00000100764	PSMC1	108.311	117.256	163.946	131.817	-0.127632	1
ENSG00000100784	RPS6KA5	8.36347	10.5055	9.69876	9.22511	0.132903	1
ENSG00000100796	PPP4R3A	149.011	142.695	160.838	153.906	-0.0628362	1
ENSG00000100802	C14orf93	5.42383	4.14565	5.0359	6.20133	-0.021236	1
ENSG00000100804	PSMB5	189.917	175.154	203.985	219.609	0.00320626	1
ENSG00000100811	YY1	122.595	134.687	146.725	142.784	0.0435795	1
ENSG00000100813	ACIN1	133.981	127.667	142.311	150.933	0.0120873	1
ENSG00000100814	CCNB1IP1	59.7864	56.8614	65.964	69.6496	0.00912451	1
ENSG00000100815	TRIP11	39.2089	51.962	57.1357	77.1322	0.423542	1
ENSG00000100823	APEX1	156.132	152.117	172.277	174.15	-0.00926309	1
ENSG00000100836	PABPN1	29.6034	24.1673	27.2311	37.1055	0.106788	1
ENSG00000100852	ARHGAP5	62.2706	63.4096	70.5025	86.6648	0.177085	1
ENSG00000100865	CINP	47.945	48.8999	58.2547	50.0206	-0.10073	1
ENSG00000100883	SRP54	73.6979	79.6154	85.6102	75.8509	-0.0342109	1
ENSG00000100888	CHD8	141.724	146.7	156.051	144.783	-0.0304853	1
ENSG00000100889	PCK2	59.7864	52.4331	26.7959	56.5294	0.329601	1
ENSG00000100890	KIAA0391	13.042	13.1436	12.3721	13.0689	0.043153	1
ENSG00000100897	DCAF11	31.5079	29.0196	32.3292	33.6717	-0.0261905	1
ENSG00000100902	PSMA6	13.3319	15.2635	11.8748	11.7876	0.100409	1
ENSG00000100906	NFKBIA	66.2867	64.3989	55.2705	65.4471	0.0937314	1
ENSG00000100908	EMC9	26.4567	23.7433	20.5166	21.7303	-0.0502155	1
ENSG00000100911	PSME2	102.018	103.688	102.956	98.8625	-0.0170568	1
ENSG00000100916	BRMS1L	14.1185	13.756	18.5893	16.554	-0.106365	1
ENSG00000100926	TM9SF1	8.40487	12.1543	10.2583	9.84012	0.243612	1
ENSG00000100934	SEC23A	213.02	221.039	245.888	201.056	-0.120301	1
ENSG00000100938	GMPR2	45.171	38.9126	47.6856	42.6405	-0.186874	1
ENSG00000100941	PNN	167.766	164.695	175.075	190.601	0.0515223	1
ENSG00000100949	RABGGTA	16.2301	13.332	12.4343	15.7339	0.0139421	1
ENSG00000100968	NFATC4	5.46524	3.86299	3.66812	2.51128	-0.524197	1
ENSG00000100979	PLTP	30.7213	28.8782	19.3975	27.1628	0.156291	1
ENSG00000100982	PCIF1	12.1312	8.80951	8.45533	10.6601	-0.0895751	1
ENSG00000100983	GSS	60.8215	56.5787	51.2294	63.6533	0.100017	1
ENSG00000100991	TRPC4AP	95.6002	93.4656	90.0866	95.2237	0.0227722	1
ENSG00000100994	PYGB	523.462	409.996	315.707	392.375	-0.0649745	1
ENSG00000100997	ABHD12	69.6818	67.5082	57.8195	47.8168	-0.145401	1
ENSG00000101000	PROCR	424.011	488.151	329.261	294.281	0.0547024	1
ENSG00000101003	GINS1	64.9204	65.3411	98.6662	75.9534	-0.210028	1
ENSG00000101017	CD40	5.63085	5.79449	4.04115	4.92006	0.135708	1
ENSG00000101019	UQCC1	114.315	123.569	113.898	94.6087	-0.0646788	1
ENSG00000101040	ZMYND8	45.6264	41.4565	41.4684	33.3642	-0.219576	1
ENSG00000101052	IFT52	20.7017	21.3407	27.4798	21.1665	-0.176532	1
ENSG00000101057	MYBL2	104.502	90.8275	109.36	118.491	-0.0310026	1
ENSG00000101079	NDRG3	25.2146	26.193	28.5367	23.934	-0.0984201	1
ENSG00000101084	C20orf24	25.7529	25.4863	14.6725	17.7327	0.0921571	1
ENSG00000101104	PABPC1L	6.74874	4.75808	3.48161	8.96886	0.409245	1
ENSG00000101109	STK4	104.419	104.207	113.898	110.394	-0.0244139	1
ENSG00000101126	ADNP	84.1729	87.2943	93.1952	80.5147	-0.0792261	1
ENSG00000101132	PFDN4	42.397	48.8527	57.5709	48.4318	-0.0367778	1
ENSG00000101138	CSTF1	72.9526	77.6368	79.8904	65.1908	-0.0969559	1
ENSG00000101146	RAE1	51.2159	52.1975	66.7722	65.9596	0.00327106	1
ENSG00000101150	TPD52L2	86.1189	79.9451	92.3248	102.604	0.0329094	1
ENSG00000101152	DNAJC5	67.5288	62.9385	62.1094	74.0572	0.0787864	1
ENSG00000101158	NELFCD	73.5737	69.2984	82.5638	82.2573	-0.0424973	1
ENSG00000101160	CTSZ	402.357	398.548	309.49	277.727	-0.0741084	1
ENSG00000101161	PRPF6	120.732	117.444	119.183	130.535	0.0475533	1
ENSG00000101166	PRELID3B	222.212	232.345	274.363	221.198	-0.130374	1
ENSG00000101181	MTG2	62.726	54.0348	52.9702	66.6771	0.0596427	1
ENSG00000101182	PSMA7	286.428	291.986	315.707	320.419	0.0245199	1
ENSG00000101187	SLCO4A1	191.366	185.565	109.36	159.338	0.196982	1
ENSG00000101188	NTSR1	31.1767	27.1352	11.6261	20.244	0.142818	1
ENSG00000101189	MRGBP	60.573	51.0198	63.3528	66.2158	-0.0801279	1
ENSG00000101190	TCFL5	21.3227	22.8011	23.4387	22.1915	0.00933452	1
ENSG00000101191	DIDO1	199.233	195.505	160.403	158.364	-0.0236991	1
ENSG00000101193	GID8	49.5598	49.6065	52.8458	54.6332	0.0260749	1
ENSG00000101194	SLC17A9	99.989	91.911	61.612	82.2573	0.106544	1
ENSG00000101199	ARFGAP1	62.1464	52.9513	36.1838	54.2232	0.121526	1
ENSG00000101210	EEF1A2	186.522	147.689	159.843	199.672	0.0036981	1
ENSG00000101216	GMEB2	29.0651	25.2037	22.8791	29.5204	0.0714799	1
ENSG00000101220	C20orf27	49.891	44.4715	44.204	56.0682	0.0940812	1
ENSG00000101224	CDC25B	74.6502	64.2576	63.788	64.832	-0.102027	1
ENSG00000101236	RNF24	36.5591	37.1695	25.2416	25.7278	0.0234195	1
ENSG00000101246	ARFRP1	13.4975	10.5526	13.4912	16.5027	0.00197406	1
ENSG00000101247	NDUFAF5	38.2153	37.9704	40.598	35.5167	-0.0999708	1
ENSG00000101255	TRIB3	177.289	142.789	87.5997	173.688	0.256057	1
ENSG00000101265	RASSF2	2.15297	2.16705	1.7408	1.02501	-0.28804	1
ENSG00000101266	CSNK2A1	65.293	68.8273	79.8904	78.8747	0.0258732	1
ENSG00000101290	CDS2	134.851	160.785	128.446	108.395	0.0319526	1
ENSG00000101294	HM13	170.789	190.182	159.097	185.63	0.187829	1
ENSG00000101310	SEC23B	125.99	132.001	149.398	136.019	-0.0385676	1
ENSG00000101311	FERMT1	39.4574	41.0796	46.3178	52.1219	0.120742	1
ENSG00000101333	PLCB4	21.6953	22.4242	28.7233	38.0792	0.264623	1
ENSG00000101337	TM9SF4	143.38	152.211	114.209	126.999	0.115669	1
ENSG00000101343	CRNKL1	48.6903	54.8828	54.2758	56.1194	0.109481	1
ENSG00000101346	POFUT1	340.377	373.203	321.116	316.421	0.060047	1
ENSG00000101347	SAMHD1	29.5206	30.7626	45.3852	31.8779	-0.254875	1
ENSG00000101350	KIF3B	87.3196	93.183	93.1952	93.5837	0.0495004	1
ENSG00000101353	MROH8	3.06384	2.11994	1.61646	2.35753	-0.0918664	1
ENSG00000101361	NOP56	416.02	410.231	460.318	504.255	0.061526	1
ENSG00000101363	MANBAL	35.8553	44.3773	41.8415	44.2805	0.192313	1
ENSG00000101365	IDH3B	80.1154	75.7053	84.9885	90.0986	0.00624696	1
ENSG00000101367	MAPRE1	140.316	146.794	185.333	160.107	-0.0849501	1
ENSG00000101384	JAG1	40.9065	43.0583	31.894	46.1768	0.290864	1
ENSG00000101391	CDK5RAP1	66.2453	62.279	61.3011	64.9345	-0.00449629	1
ENSG00000101400	SNTA1	7.36979	7.53755	5.84413	5.58632	-0.0151659	1
ENSG00000101407	TTI1	65.1274	70.4761	76.6575	70.8796	-0.00329413	1
ENSG00000101412	E2F1	36.8903	35.8505	35.0648	43.7168	0.144046	1
ENSG00000101413	RPRD1B	36.0623	37.8762	41.8415	36.9005	-0.0571806	1
ENSG00000101417	PXMP4	11.5515	11.589	9.01487	6.25258	-0.20658	1
ENSG00000101421	CHMP4B	17.3894	15.8289	15.6051	20.0902	0.119387	1
ENSG00000101439	CST3	142.841	133.792	87.2889	99.6312	0.0196186	1
ENSG00000101442	ACTR5	15.4434	14.1329	15.2942	18.604	0.0896834	1
ENSG00000101444	AHCY	283.944	253.686	253.1	263.684	-0.0540674	1
ENSG00000101447	FAM83D	80.0326	80.0394	86.6671	72.6734	-0.125814	1
ENSG00000101452	DHX35	23.5999	24.2615	26.0499	25.7278	0.0113571	1
ENSG00000101457	DNTTIP1	16.5613	16.2528	18.7136	19.219	0.00968317	1
ENSG00000101464	PIGU	69.5162	83.3841	63.3528	61.1933	0.12161	1
ENSG00000101473	ACOT8	6.2519	5.22918	4.47635	6.86758	0.159715	1
ENSG00000101474	APMAP	359.546	389.126	305.449	297.664	0.0464	1
ENSG00000101493	ZNF516	25.7529	26.0045	18.6515	21.4228	0.0915339	1
ENSG00000101544	ADNP2	64.2579	70.0521	67.2074	71.2384	0.104322	1
ENSG00000101546	RBFA	9.68837	10.8352	12.31	11.6339	0.0355083	1
ENSG00000101557	USP14	42.397	49.0883	55.084	44.4343	-0.0573309	1
ENSG00000101558	VAPA	151.163	165.496	185.209	167.538	-0.0138445	1
ENSG00000101574	METTL4	15.2778	15.028	20.8275	16.9127	-0.171975	1
ENSG00000101577	LPIN2	27.9472	27.2294	28.5989	26.5991	-0.0706076	1
ENSG00000101596	SMCHD1	107.731	105.903	128.944	136.429	0.0345126	1
ENSG00000101608	MYL12A	178.821	190.512	183.344	161.234	-0.0419632	1
ENSG00000101624	CEP76	15.8989	17.9488	20.7653	13.7352	-0.205384	1
ENSG00000101639	CEP192	54.8594	56.4845	65.4666	57.042	-0.0825065	1
ENSG00000101654	RNMT	57.592	61.0542	60.5551	61.7058	0.0556986	1
ENSG00000101665	SMAD7	5.42383	6.17137	3.85464	4.97131	0.252691	1
ENSG00000101670	LIPG	5.92067	5.22918	3.97898	2.76753	-0.312124	1
ENSG00000101680	LAMA1	1055.49	1083.85	778.388	957.259	0.154342	1
ENSG00000101745	ANKRD12	11.6343	16.4884	15.7916	18.5527	0.35816	1
ENSG00000101751	POLI	16.6441	15.5462	15.8537	16.2465	-0.032923	1
ENSG00000101752	MIB1	149.011	142.177	129.13	120.644	-0.0820004	1
ENSG00000101773	RBBP8	51.9197	54.1761	64.0989	67.8558	0.0740643	1
ENSG00000101782	RIOK3	49.0629	45.508	54.2758	61.2445	0.0472284	1
ENSG00000101811	CSTF2	73.7807	73.5382	79.5796	92.5586	0.115282	1
ENSG00000101843	PSMD10	60.0348	63.2212	83.5586	61.9108	-0.196698	1
ENSG00000101844	ATG4A	12.7522	13.332	12.4965	11.7876	-0.00726446	1
ENSG00000101846	STS	11.4687	12.6254	14.2373	12.9152	-0.00481438	1
ENSG00000101849	TBL1X	37.7184	37.3109	38.6085	37.618	-0.0263751	1
ENSG00000101856	PGRMC1	621.671	755.922	694.581	472.326	-0.0997417	1
ENSG00000101868	POLA1	73.9049	76.883	100.283	89.2786	-0.0669612	1
ENSG00000101871	MID1	58.0474	60.112	62.6689	61.9108	0.0161645	1
ENSG00000101882	NKAP	34.7788	32.1288	36.7434	39.8217	0.00876178	1
ENSG00000101888	NXT2	25.0076	30.1502	39.7898	31.5704	-0.066223	1
ENSG00000101898	MCTS2P	2.93963	2.63814	3.79246	2.76753	-0.30282	1
ENSG00000101901	ALG13	35.6482	38.9126	48.4316	46.6893	0.0282241	1
ENSG00000101911	PRPS2	121.767	126.584	165.003	122.745	-0.200983	1
ENSG00000101928	MOSPD1	15.4848	15.6404	18.6515	17.989	-0.0185689	1
ENSG00000101935	AMMECR1	55.1078	55.7779	67.6426	59.3995	-0.0903975	1
ENSG00000101940	WDR13	30.5556	25.0152	24.993	31.9804	0.0338553	1
ENSG00000101945	SUV39H1	30.2658	27.8889	31.3345	32.5442	-0.027548	1
ENSG00000101955	SRPX	127.564	140.717	90.5218	96.2487	0.119133	1
ENSG00000101966	XIAP	102.97	102.228	107.246	114.955	0.0471263	1
ENSG00000101972	STAG2	321.041	317.755	383.971	351.477	-0.0749428	1
ENSG00000101974	ATP11C	301.043	333.395	306.133	266.606	-0.0170669	1
ENSG00000101986	ABCD1	27.409	22.2829	13.8021	15.3752	-0.134168	1
ENSG00000101997	CCDC22	14.988	12.7667	13.3669	16.8615	0.0598941	1
ENSG00000102003	SYP	3.02244	2.30837	2.85989	2.76753	-0.21793	1
ENSG00000102007	PLP2	244.611	261.789	231.092	186.962	-0.0841212	1
ENSG00000102024	PLS3	196.293	233.476	225.683	218.891	0.100663	1
ENSG00000102030	NAA10	33.0812	30.1031	31.3345	34.5429	0.00397266	1
ENSG00000102034	ELF4	14.1599	15.4991	15.9159	17.1177	0.119355	1
ENSG00000102038	SMARCA1	21.8195	21.2936	25.9877	18.6552	-0.255688	1
ENSG00000102048	ASB9	21.4469	20.0216	27.7285	18.809	-0.336818	1
ENSG00000102054	RBBP7	198.529	198.756	229.04	195.47	-0.11682	1
ENSG00000102078	SLC25A14	17.8034	15.3578	19.7706	13.1714	-0.394471	1
ENSG00000102081	FMR1	73.4495	70.2405	92.9465	81.4373	-0.132554	1
ENSG00000102096	PIM2	26.0427	25.4863	25.366	24.6003	-0.0379132	1
ENSG00000102098	SCML2	31.7563	35.0025	44.2661	35.9779	-0.0958022	1
ENSG00000102100	SLC35A2	61.6081	56.5316	46.1935	55.5044	0.053392	1
ENSG00000102103	PQBP1	46.7443	45.084	50.732	58.9895	0.0947095	1
ENSG00000102109	PCSK1N	2.89823	1.55462	1.3056	1.38377	-0.549488	1
ENSG00000102119	EMD	33.7851	31.9404	33.9457	39.0017	0.0663833	1
ENSG00000102125	TAZ	34.8202	29.2551	25.3038	27.4703	-0.0874923	1
ENSG00000102144	PGK1	896.299	902.48	1018.37	968.688	-0.0331001	1
ENSG00000102158	MAGT1	426.868	542.704	479.964	406.161	0.0655111	1
ENSG00000102172	SMS	200.972	211.004	252.106	221.966	-0.0650795	1
ENSG00000102174	PHEX	2.02876	1.4604	1.86515	2.56253	0.0351473	1
ENSG00000102178	UBL4A	118.703	107.693	112.157	131.919	0.0532917	1
ENSG00000102181	CD99L2	172.942	174.824	136.156	133.303	-0.00495352	1
ENSG00000102189	EEA1	60.8629	75.2342	68.5752	88.8173	0.342506	1
ENSG00000102218	RP2	86.3673	103.359	99.5988	63.602	-0.154802	1
ENSG00000102221	JADE3	23.5171	22.3771	23.9982	24.344	-0.0242534	1
ENSG00000102225	CDK16	98.7055	85.033	88.0971	97.8887	-0.031024	1
ENSG00000102226	USP11	31.5907	27.7947	29.4071	32.8517	-0.0098275	1
ENSG00000102241	HTATSF1	121.767	118.528	153.937	122.745	-0.191723	1
ENSG00000102265	TIMP1	364.432	357.563	176.816	212.946	0.0757136	1
ENSG00000102271	KLHL4	14.4912	15.6404	19.9571	14.8627	-0.16963	1
ENSG00000102287	GABRE	3.68489	3.01502	3.73029	3.7413	-0.135688	1
ENSG00000102290	PCDH11X	22.5234	22.8482	25.6147	30.2379	0.142253	1
ENSG00000102302	FGD1	16.8511	15.1693	12.1235	16.5027	0.121854	1
ENSG00000102309	PIN4	20.2462	18.2314	23.0035	24.1903	-0.0268634	1
ENSG00000102312	PORCN	6.2933	6.97223	3.29509	4.71506	0.272793	1
ENSG00000102316	MAGED2	74.3603	64.7758	55.5192	46.5356	-0.22354	1
ENSG00000102317	RBM3	427.324	426.625	495.196	501.385	0.00866291	1
ENSG00000102359	SRPX2	60.6558	62.7972	47.0639	47.7143	0.0357888	1
ENSG00000102362	SYTL4	32.336	34.5785	24.993	22.3453	-0.0117397	1
ENSG00000102384	CENPI	57.7162	61.9963	67.7048	52.6856	-0.127754	1
ENSG00000102390	PBDC1	17.141	18.891	18.2163	22.0378	0.211762	1
ENSG00000102393	GLA	404.262	486.125	433.274	435.272	0.137773	1
ENSG00000102401	ARMCX3	66.8249	68.4033	50.732	48.9956	-0.00294851	1
ENSG00000102452	NALCN	7.94943	8.62107	5.40892	5.99632	0.121526	1
ENSG00000102466	FGF14	11.5101	11.6832	17.035	8.3026	-0.50665	1
ENSG00000102471	NDFIP2	81.1505	91.6283	89.4027	63.8583	-0.132674	1
ENSG00000102531	FNDC3A	78.0452	76.3648	70.5025	79.6435	0.070006	1
ENSG00000102543	CDADC1	6.70734	7.39622	7.52276	6.25258	-0.0554941	1
ENSG00000102547	CAB39L	2.85683	3.06213	3.79246	4.61256	0.215653	1
ENSG00000102554	KLF5	20.9915	19.5505	24.8064	32.1341	0.175257	1
ENSG00000102572	STK24	89.0999	85.3156	95.4955	91.2261	-0.0640391	1
ENSG00000102580	DNAJC3	234.715	279.078	295.315	252.204	0.0038002	1
ENSG00000102595	UGGT2	72.0004	81.1229	69.943	71.6996	0.106492	1
ENSG00000102606	ARHGEF7	31.2595	31.5635	29.2206	33.7742	0.110175	1
ENSG00000102699	PARP4	116.095	118.669	124.84	108.754	-0.0828885	1
ENSG00000102710	SUPT20H	37.1802	34.2959	39.4789	35.1579	-0.141663	1
ENSG00000102738	MRPS31	23.3101	25.9574	29.5315	25.3691	-0.0383735	1
ENSG00000102743	SLC25A15	49.8082	48.7114	54.8975	50.4306	-0.0778392	1
ENSG00000102753	KPNA3	49.1871	51.6322	64.9071	59.1945	-0.0402137	1
ENSG00000102763	VWA8	60.2418	60.0649	52.4106	50.3281	-0.0300819	1
ENSG00000102780	DGKH	18.5901	19.1736	18.0297	23.729	0.227034	1
ENSG00000102781	KATNAL1	12.8764	14.0387	16.4133	14.8114	-0.0168085	1
ENSG00000102786	INTS6	106.862	107.787	112.531	109.83	-0.011511	1
ENSG00000102804	TSC22D1	252.891	253.356	228.978	180.658	-0.15093	1
ENSG00000102805	CLN5	28.7339	36.8398	38.2355	31.2629	0.0273279	1
ENSG00000102858	MGRN1	18.9627	14.2742	12.4343	16.2465	-0.048053	1
ENSG00000102870	ZNF629	34.4476	30.5271	31.0236	33.7742	-0.0277857	1
ENSG00000102871	TRADD	13.0834	13.1436	13.3047	13.3252	0.004787	1
ENSG00000102878	HSF4	4.51296	3.15635	1.92732	3.12629	-0.0603328	1
ENSG00000102882	MAPK3	10.2266	9.46905	8.76619	8.14885	-0.112042	1
ENSG00000102890	ELMO3	2.27718	2.21416	2.11383	2.15253	-0.0128659	1
ENSG00000102893	PHKB	90.6318	94.5491	122.727	91.3799	-0.197346	1
ENSG00000102897	LYRM1	18.3831	18.4199	20.1436	21.884	0.0661762	1
ENSG00000102898	NUTF2	143.918	155.179	162.392	156.263	0.0243618	1
ENSG00000102900	NUP93	185.694	183.869	198.079	182.914	-0.0651604	1
ENSG00000102901	CENPT	21.4469	18.3257	19.211	21.3715	-0.0366793	1
ENSG00000102908	NFAT5	7.16277	6.12426	6.96321	9.73762	0.164126	1
ENSG00000102910	LONP2	137.5	143.213	153.253	132.124	-0.0781605	1
ENSG00000102921	N4BP1	18.8385	18.1372	21.6357	19.8852	-0.0878124	1
ENSG00000102931	ARL2BP	83.8417	88.8018	121.483	91.7386	-0.184399	1
ENSG00000102967	DHODH	48.4005	46.0733	45.1365	43.6655	-0.0604657	1
ENSG00000102974	CTCF	90.4662	92.4292	109.608	104.91	-0.0192274	1
ENSG00000102977	ACD	24.7178	19.9745	20.0814	25.6253	0.0217058	1
ENSG00000102978	POLR2C	104.336	110.425	137.213	127.512	-0.0209974	1
ENSG00000102996	MMP15	27.7816	26.2872	14.1751	20.039	0.13817	1
ENSG00000103005	USB1	12.1312	10.1286	12.683	13.0689	-0.0973537	1
ENSG00000103018	CYB5B	66.4109	68.4033	90.7705	73.0834	-0.150285	1
ENSG00000103021	CCDC113	17.8862	16.8182	18.2784	23.3703	0.151495	1
ENSG00000103024	NME3	33.9921	27.1352	18.7136	21.3715	-0.123811	1
ENSG00000103034	NDRG4	7.494	7.53755	9.8231	4.76631	-0.484582	1
ENSG00000103035	PSMD7	177.165	180.571	190.991	168.717	-0.0756484	1
ENSG00000103037	SETD6	54.4868	55.2126	62.7311	59.4507	-0.0307349	1
ENSG00000103042	SLC38A7	37.7184	38.8184	26.2986	37.823	0.255782	1
ENSG00000103043	VAC14	24.2209	20.3514	18.2163	25.4203	0.104316	1
ENSG00000103047	TANGO6	46.9514	48.2403	46.6287	47.3043	0.0299376	1
ENSG00000103051	COG4	38.5465	35.3794	41.7793	38.848	-0.113177	1
ENSG00000103061	SLC7A6OS	52.665	53.6108	48.2451	51.2506	0.054592	1
ENSG00000103064	SLC7A6	100.858	105.95	103.453	114.238	0.108008	1
ENSG00000103066	PLA2G15	24.9662	25.8632	18.7136	20.6028	0.085905	1
ENSG00000103091	WDR59	28.1128	27.1823	25.1173	29.5204	0.0890452	1
ENSG00000103111	MON1B	35.0686	36.1802	32.7022	34.6454	0.062698	1
ENSG00000103121	CMC2	32.9984	41.0325	40.7845	33.7742	0.0225795	1
ENSG00000103126	AXIN1	45.9163	39.3837	30.3397	48.4318	0.200098	1
ENSG00000103145	HCFC1R1	8.90171	8.14998	8.89053	7.07259	-0.223857	1
ENSG00000103148	NPRL3	14.4912	11.3063	12.9939	14.3502	-0.10272	1
ENSG00000103150	MLYCD	3.31226	2.30837	1.7408	2.92129	0.0207105	1
ENSG00000103152	MPG	53.6173	46.4502	37.9246	41.5643	-0.0591705	1
ENSG00000103154	NECAB2	3.43647	1.9315	2.67338	3.17754	-0.27418	1
ENSG00000103160	HSDL1	69.806	75.0457	57.26	48.8419	-0.0370576	1
ENSG00000103168	TAF1C	13.6631	12.013	9.3879	13.0689	0.113173	1
ENSG00000103174	NAGPA	43.1008	39.3366	28.0394	39.6167	0.146875	1
ENSG00000103187	COTL1	35.9795	33.3065	32.0183	41.4105	0.133999	1
ENSG00000103194	USP10	96.8423	104.725	114.893	110.958	0.0273673	1
ENSG00000103197	TSC2	29.8104	24.7797	21.8222	29.5716	0.0696084	1
ENSG00000103199	ZNF500	8.57048	8.80951	6.96321	8.86636	0.179224	1
ENSG00000103202	NME4	91.7497	77.4954	79.2066	85.4348	-0.0703309	1
ENSG00000103222	ABCC1	169.712	171.479	128.695	175.277	0.215881	1
ENSG00000103226	NOMO3	11.8413	12.0601	10.6313	9.48137	-0.0624888	1
ENSG00000103227	LMF1	13.5803	10.9294	6.52801	9.53262	0.0154835	1
ENSG00000103241	FOXF1	7.78382	5.41761	2.85989	3.7413	-0.228515	1
ENSG00000103245	NARFL	18.5901	16.3471	13.7399	19.014	0.12308	1
ENSG00000103248	MTHFSD	12.3796	12.013	11.5639	13.4789	0.0880954	1
ENSG00000103249	CLCN7	89.5554	80.746	60.9903	105.269	0.30348	1
ENSG00000103253	HAGHL	12.8764	12.2485	8.0823	11.3776	0.163102	1
ENSG00000103254	FAM173A	15.9403	12.8138	8.82836	10.9164	-0.0700001	1
ENSG00000103257	SLC7A5	489.139	462.57	334.234	633.56	0.41251	1
ENSG00000103260	METRN	46.6201	33.0239	22.7548	25.1128	-0.257427	1
ENSG00000103264	FBXO31	15.6919	16.6768	13.6777	16.7077	0.18141	1
ENSG00000103266	STUB1	60.5316	49.0412	47.0639	58.9382	0.00299623	1
[truncated: 10,241 more rows]
